# Supplementary material
Source: publisher figshare collection journal article supplement (https://tandf.figshare.com/articles/dataset/_/16619738)
Supplement: Supplementary file 1 [file 2]

Supplementary Material (Section B): Full Simulation Results

Yanling Li, Julie Wood, Linying Ji, Sy-Miin Chow, Zita Oravecz

The Pennsylvania State University

Author Note

Correspondence concerning this article can be addressed to Yanling Li, The Pennsylvania State University, 420 Biobehavioral Health Building, University Park, PA 16802 or by email to [yxl823@psu.edu](mailto:yxl823@psu.edu).

## Supplementary Material (Section B): Full Simulation Results

The summary statistics for all parameters (including person-specific parameters and between-level parameters) are summarized in the following tables. In each table, “True” represents the true value; “RBias” represents the relative bias; “SENS” represents sensitivity; “CR” represents the coverage rate; “ESS” represents the average effective sample size (ESS) across replications; “%ESS” represents the percentage of replications with ESS greater than 800; and “%Rhat” represents the percentage of replications with  $\hat{R}$  less than 1.1.

In terms of blank entries in the tables, (1) true values of person-specific parameters could not be summarized in a cell; (2) the relative bias and sensitivity statistics did not apply to parameters whose true values were zero. This is because sensitivity was defined as the proportion of replications in which the credible intervals did not contain zero. In fact, sensitivity is not informative when applied to parameters whose true values are further away from zero. For instance, as indicated in the following tables, the sensitivity value was always 1 or close to 1 for intercept and standard deviation parameters. (3) ESS and  $\hat{R}$  statistics were omitted for person-specific parameters and parameters related to random innovation variances and covariances in Tables S11 - S15. This is because we only asked for 1000 plausible values in Mplus and the corresponding ESS would be less than 1000. We thus decided to omit ESS for these parameters. Additionally, the calculation of  $\hat{R}$  involved extracting plausible values from more than one chain, which means that we need to set another seed and re-run the model from the beginning. Due to the high computational time involved, we decided to run only one chain and omit  $\hat{R}$  for these parameters.

Simulation results for Stan, JAGS, and Mplus under different conditions are shown in Tables S1 - S5, S6 - S10, and S11 - S15, respectively. As discussed in the main manuscript, all three software programs yielded satisfactory performance under all conditions. Of the three programs, Stan displayed the best overall performance in terms of estimation accuracy and sampling efficiency; JAGS showed slightly worse performance on the

estimation of some parameters as well as the sampling efficiency (see detailed discussion in the Simulation Results section in the main manuscript), but the biases could be reduced when there were no partially observed cases in the data; Mplus showed slightly greater biases in the estimation of some parameters with small sample sizes (see detailed discussion in the Simulation Results section), but those biases could be reduced with larger sample sizes (see, e.g., Table S15).

Table S1

*Simulation results for Stan under the low stability condition ( $N = 100$  persons,  $T = 60$  time points)*

| Par                  | True | Bias  | RBias | SE   | MCSE | RMSE | SENS | CR(%) | ESS   | %ESS | %Rhat |
|----------------------|------|-------|-------|------|------|------|------|-------|-------|------|-------|
| $\mu_1$              | 0.5  | -0.01 | -0.01 | 0.05 | 0.05 | 0.05 | 1.00 | 95    | 12565 | 100  | 100   |
| $\alpha_{\mu_1}$     | -0.3 | 0.01  | -0.02 | 0.06 | 0.06 | 0.06 | 1.00 | 93    | 9267  | 100  | 100   |
| $\mu_2$              | 0.5  | 0.01  | 0.01  | 0.05 | 0.05 | 0.05 | 1.00 | 95    | 11924 | 100  | 100   |
| $\alpha_{\mu_2}$     | 0.3  | -0.00 | -0.00 | 0.05 | 0.06 | 0.06 | 1.00 | 93    | 9653  | 100  | 100   |
| $a_1$                | 0.3  | -0.00 | -0.00 | 0.02 | 0.02 | 0.02 | 1.00 | 96    | 10111 | 100  | 100   |
| $\alpha_{a_1}$       | -0.2 | 0.00  | -0.01 | 0.02 | 0.02 | 0.02 | 1.00 | 94    | 14991 | 100  | 100   |
| $a_2$                | 0.3  | 0.00  | 0.00  | 0.02 | 0.02 | 0.02 | 1.00 | 97    | 11241 | 100  | 100   |
| $\alpha_{a_2}$       | 0.2  | 0.00  | 0.01  | 0.02 | 0.01 | 0.01 | 1.00 | 99    | 15060 | 100  | 100   |
| $b_1$                | -0.1 | -0.00 | 0.04  | 0.02 | 0.02 | 0.02 | 1.00 | 94    | 8422  | 99   | 100   |
| $\alpha_{b_1}$       | -0.2 | 0.00  | -0.00 | 0.02 | 0.02 | 0.02 | 1.00 | 95    | 10600 | 100  | 100   |
| $b_2$                | -0.1 | -0.00 | 0.03  | 0.02 | 0.02 | 0.02 | 1.00 | 99    | 8666  | 100  | 100   |
| $\alpha_{b_2}$       | 0.2  | -0.00 | -0.01 | 0.02 | 0.02 | 0.02 | 1.00 | 94    | 10886 | 100  | 100   |
| $l\sigma_1$          | 0.5  | -0.00 | -0.00 | 0.03 | 0.04 | 0.04 | 1.00 | 92    | 37730 | 100  | 100   |
| $\alpha_{l\sigma_1}$ | -0.3 | 0.00  | -0.01 | 0.03 | 0.04 | 0.04 | 1.00 | 95    | 37626 | 100  | 100   |
| $l\sigma_2$          | 0.5  | -0.00 | -0.00 | 0.03 | 0.03 | 0.03 | 1.00 | 99    | 37919 | 100  | 99    |
| $\alpha_{l\sigma_2}$ | 0.3  | -0.00 | -0.00 | 0.03 | 0.03 | 0.03 | 1.00 | 98    | 39499 | 100  | 100   |
| $z$                  | 0.5  | 0.00  | 0.01  | 0.04 | 0.03 | 0.03 | 1.00 | 96    | 25350 | 99   | 100   |
| $\alpha_z$           | -0.3 | -0.00 | 0.01  | 0.04 | 0.04 | 0.04 | 1.00 | 97    | 25474 | 100  | 100   |
| $\psi_1$             | 0.3  | -0.00 | -0.00 | 0.05 | 0.05 | 0.05 | 1.00 | 94    | 7944  | 100  | 100   |
| $\psi_2$             | 0.3  | -0.00 | -0.01 | 0.04 | 0.04 | 0.04 | 1.00 | 95    | 9677  | 100  | 100   |
| $\psi_3$             | 0.1  | -0.01 | -0.06 | 0.02 | 0.02 | 0.02 | 1.00 | 94    | 3266  | 93   | 100   |
| $\psi_4$             | 0.1  | -0.00 | -0.03 | 0.02 | 0.02 | 0.02 | 1.00 | 93    | 4320  | 94   | 99    |
| $\psi_5$             | 0.1  | 0.00  | 0.03  | 0.02 | 0.02 | 0.02 | 1.00 | 90    | 6023  | 100  | 100   |
| $\psi_6$             | 0.1  | 0.00  | 0.03  | 0.02 | 0.02 | 0.02 | 1.00 | 91    | 6669  | 99   | 100   |
| $\psi_7$             | 0.3  | 0.01  | 0.04  | 0.03 | 0.03 | 0.03 | 1.00 | 93    | 30712 | 100  | 100   |
| $\psi_8$             | 0.3  | 0.01  | 0.03  | 0.03 | 0.02 | 0.03 | 1.00 | 94    | 30550 | 100  | 100   |
| $\psi_9$             | 0.3  | 0.01  | 0.04  | 0.03 | 0.03 | 0.03 | 1.00 | 94    | 15747 | 100  | 100   |
| $\psi_{21}$          | -0.0 | 0.02  | -0.36 | 0.02 | 0.02 | 0.02 | 0.36 | 88    | 8365  | 100  | 100   |
| $\psi_{31}$          | 0.0  | -0.01 | -0.48 | 0.01 | 0.01 | 0.01 | 0.17 | 82    | 6933  | 100  | 100   |
| $\psi_{42}$          | 0.0  | -0.01 | -0.41 | 0.01 | 0.01 | 0.01 | 0.26 | 83    | 8103  | 100  | 100   |
| $\psi_{32}$          | 0.0  | 0.00  |       | 0.01 | 0.00 | 0.00 |      | 98    | 8253  | 100  | 100   |
| $\psi_{41}$          | 0.0  | 0.00  |       | 0.01 | 0.00 | 0.00 |      | 100   | 7836  | 100  | 100   |
| $\psi_{43}$          | 0.0  | 0.00  |       | 0.00 | 0.00 | 0.00 |      | 100   | 7327  | 100  | 100   |
| $\psi_{51}$          | 0.0  | -0.00 |       | 0.01 | 0.00 | 0.00 |      | 100   | 9243  | 100  | 100   |
| $\psi_{52}$          | 0.0  | -0.00 |       | 0.01 | 0.00 | 0.00 |      | 100   | 7084  | 100  | 100   |
| $\psi_{53}$          | 0.0  | -0.00 |       | 0.00 | 0.00 | 0.00 |      | 99    | 7454  | 100  | 100   |
| $\psi_{54}$          | 0.0  | 0.00  |       | 0.00 | 0.00 | 0.00 |      | 97    | 7106  | 100  | 100   |
| $\psi_{61}$          | 0.0  | -0.00 |       | 0.01 | 0.01 | 0.01 |      | 98    | 6946  | 100  | 99    |
| $\psi_{62}$          | 0.0  | 0.00  |       | 0.01 | 0.00 | 0.00 |      | 99    | 10068 | 100  | 100   |
| $\psi_{63}$          | 0.0  | 0.00  |       | 0.00 | 0.00 | 0.00 |      | 99    | 6926  | 100  | 100   |
| $\psi_{64}$          | 0.0  | 0.00  |       | 0.00 | 0.00 | 0.00 |      | 98    | 8060  | 100  | 100   |
| $\psi_{65}$          | 0.0  | -0.00 |       | 0.00 | 0.00 | 0.00 |      | 99    | 6253  | 100  | 100   |
| $\psi_{71}$          | 0.0  | 0.00  |       | 0.01 | 0.01 | 0.01 |      | 96    | 14999 | 100  | 100   |
| $\psi_{72}$          | 0.0  | -0.00 |       | 0.01 | 0.01 | 0.01 |      | 97    | 18319 | 100  | 100   |
| $\psi_{73}$          | 0.0  | -0.00 |       | 0.01 | 0.00 | 0.00 |      | 99    | 12833 | 100  | 100   |
| $\psi_{74}$          | 0.0  | -0.00 |       | 0.01 | 0.00 | 0.00 |      | 100   | 13827 | 100  | 100   |
| $\psi_{75}$          | 0.0  | -0.00 |       | 0.01 | 0.00 | 0.00 |      | 96    | 13466 | 100  | 100   |
| $\psi_{76}$          | 0.0  | 0.00  |       | 0.01 | 0.00 | 0.00 |      | 98    | 14216 | 100  | 100   |
| $\psi_{81}$          | 0.0  | 0.00  |       | 0.01 | 0.01 | 0.01 |      | 98    | 16976 | 100  | 100   |
| $\psi_{82}$          | 0.0  | -0.00 |       | 0.01 | 0.01 | 0.01 |      | 99    | 16414 | 100  | 100   |
| $\psi_{83}$          | 0.0  | 0.00  |       | 0.01 | 0.00 | 0.00 |      | 100   | 12566 | 100  | 100   |

*Continued on next page*

Table S1 – *Continued from previous page*

| Par              | True | Bias  | RBias | SE   | MCSE | RMSE | SENS | CR(%) | ESS   | %ESS | %Rhat |
|------------------|------|-------|-------|------|------|------|------|-------|-------|------|-------|
| $\psi_{84}$      | 0.0  | -0.00 |       | 0.01 | 0.00 | 0.00 |      | 98    | 13767 | 100  | 100   |
| $\psi_{85}$      | 0.0  | 0.00  |       | 0.01 | 0.00 | 0.00 |      | 98    | 13876 | 100  | 100   |
| $\psi_{86}$      | 0.0  | 0.00  |       | 0.01 | 0.00 | 0.00 |      | 98    | 14219 | 100  | 100   |
| $\psi_{87}$      | 0.0  | 0.00  |       | 0.01 | 0.01 | 0.01 |      | 96    | 28906 | 100  | 100   |
| $\psi_{91}$      | 0.0  | 0.00  |       | 0.02 | 0.01 | 0.01 |      | 99    | 13378 | 100  | 100   |
| $\psi_{92}$      | 0.0  | -0.00 |       | 0.01 | 0.01 | 0.01 |      | 96    | 13949 | 100  | 100   |
| $\psi_{93}$      | 0.0  | 0.00  |       | 0.01 | 0.00 | 0.00 |      | 100   | 9799  | 100  | 100   |
| $\psi_{94}$      | 0.0  | -0.00 |       | 0.01 | 0.00 | 0.00 |      | 99    | 10972 | 100  | 100   |
| $\psi_{95}$      | 0.0  | 0.00  |       | 0.01 | 0.00 | 0.00 |      | 99    | 11484 | 100  | 100   |
| $\psi_{96}$      | 0.0  | 0.00  |       | 0.01 | 0.00 | 0.00 |      | 98    | 11928 | 100  | 100   |
| $\psi_{97}$      | 0.0  | 0.00  |       | 0.01 | 0.01 | 0.01 |      | 96    | 22818 | 100  | 100   |
| $\psi_{98}$      | 0.0  | -0.00 |       | 0.01 | 0.01 | 0.01 |      | 97    | 23563 | 100  | 100   |
| $\mu_{1,i}$      |      | -0.00 | 1.59  | 0.22 | 0.36 | 0.23 | 0.62 | 94    | 22465 | 100  | 100   |
| $\mu_{2,i}$      |      | 0.00  | -0.19 | 0.21 | 0.37 | 0.23 | 0.67 | 94    | 23554 | 100  | 100   |
| $a_{1,i}$        |      | -0.00 | -0.04 | 0.08 | 0.21 | 0.09 | 0.77 | 92    | 17109 | 100  | 100   |
| $a_{2,i}$        |      | 0.00  | 0.07  | 0.08 | 0.21 | 0.08 | 0.78 | 93    | 18452 | 100  | 100   |
| $b_{1,i}$        |      | -0.00 | -0.57 | 0.08 | 0.21 | 0.09 | 0.48 | 93    | 18719 | 100  | 100   |
| $b_{2,i}$        |      | -0.00 | -0.49 | 0.08 | 0.21 | 0.09 | 0.48 | 93    | 19048 | 100  | 100   |
| $\sigma_{1,i}^2$ |      | 0.01  | 0.05  | 0.82 | 3.81 | 1.08 | 1.00 | 95    | 25898 | 100  | 100   |
| $\sigma_{2,i}^2$ |      | 0.02  | 0.05  | 0.82 | 3.69 | 1.07 | 1.00 | 95    | 26383 | 100  | 100   |
| $r_i$            |      | 0.00  | 0.35  | 0.12 | 0.29 | 0.13 | 0.70 | 94    | 20949 | 100  | 100   |

Table S2

*Simulation results for Stan under the high stability condition ( $N = 100$  persons,  $T = 60$  time points)*

| Par                  | True | Bias  | RBias | SE   | MCSE | RMSE | SENS | CR(%) | ESS   | %ESS | %Rhat |
|----------------------|------|-------|-------|------|------|------|------|-------|-------|------|-------|
| $\mu_1$              | 0.5  | -0.03 | -0.06 | 0.07 | 0.07 | 0.08 | 1.00 | 94    | 4792  | 100  | 100   |
| $\alpha_{\mu_1}$     | -0.3 | 0.02  | -0.08 | 0.08 | 0.08 | 0.09 | 0.95 | 94    | 3437  | 99   | 100   |
| $\mu_2$              | 0.5  | -0.02 | -0.04 | 0.06 | 0.07 | 0.07 | 1.00 | 90    | 6249  | 99   | 100   |
| $\alpha_{\mu_2}$     | 0.3  | -0.01 | -0.03 | 0.07 | 0.07 | 0.07 | 0.99 | 96    | 3865  | 99   | 100   |
| $a_1$                | 0.6  | -0.02 | -0.03 | 0.02 | 0.01 | 0.02 | 1.00 | 82    | 11285 | 99   | 100   |
| $\alpha_{a_1}$       | -0.2 | 0.03  | -0.14 | 0.01 | 0.02 | 0.03 | 1.00 | 47    | 15071 | 100  | 100   |
| $a_2$                | 0.5  | -0.01 | -0.01 | 0.02 | 0.01 | 0.02 | 1.00 | 98    | 11590 | 99   | 100   |
| $\alpha_{a_2}$       | 0.2  | -0.01 | -0.07 | 0.01 | 0.01 | 0.02 | 1.00 | 82    | 14061 | 99   | 100   |
| $b_1$                | -0.1 | 0.00  | -0.05 | 0.02 | 0.02 | 0.02 | 1.00 | 91    | 9655  | 100  | 100   |
| $\alpha_{b_1}$       | -0.2 | -0.00 | 0.02  | 0.02 | 0.02 | 0.02 | 1.00 | 93    | 11065 | 100  | 100   |
| $b_2$                | -0.1 | -0.00 | 0.01  | 0.02 | 0.02 | 0.02 | 1.00 | 94    | 9829  | 100  | 100   |
| $\alpha_{b_2}$       | 0.2  | -0.00 | -0.01 | 0.02 | 0.02 | 0.02 | 1.00 | 95    | 11527 | 100  | 100   |
| $l\sigma_1$          | 0.5  | 0.01  | 0.01  | 0.03 | 0.04 | 0.04 | 1.00 | 94    | 28894 | 100  | 100   |
| $\alpha_{l\sigma_1}$ | -0.3 | 0.00  | -0.01 | 0.03 | 0.03 | 0.03 | 1.00 | 96    | 27499 | 100  | 100   |
| $l\sigma_2$          | 0.5  | -0.00 | -0.00 | 0.03 | 0.03 | 0.03 | 1.00 | 96    | 29486 | 99   | 99    |
| $\alpha_{l\sigma_2}$ | 0.3  | -0.00 | -0.01 | 0.03 | 0.03 | 0.03 | 1.00 | 98    | 30400 | 99   | 100   |
| $z$                  | 0.5  | -0.00 | -0.01 | 0.04 | 0.03 | 0.03 | 1.00 | 97    | 21179 | 100  | 100   |
| $\alpha_z$           | -0.3 | 0.00  | -0.00 | 0.04 | 0.04 | 0.04 | 1.00 | 94    | 21253 | 100  | 100   |
| $\psi_1$             | 0.3  | -0.05 | -0.16 | 0.08 | 0.08 | 0.09 | 1.00 | 90    | 1878  | 74   | 100   |
| $\psi_2$             | 0.3  | -0.02 | -0.07 | 0.06 | 0.06 | 0.07 | 1.00 | 90    | 4205  | 96   | 100   |
| $\psi_3$             | 0.1  | -0.00 | -0.05 | 0.02 | 0.02 | 0.02 | 1.00 | 92    | 6243  | 100  | 100   |
| $\psi_4$             | 0.1  | -0.00 | -0.01 | 0.02 | 0.02 | 0.02 | 1.00 | 96    | 5709  | 100  | 100   |
| $\psi_5$             | 0.1  | 0.00  | 0.03  | 0.02 | 0.02 | 0.02 | 1.00 | 94    | 7268  | 100  | 100   |
| $\psi_6$             | 0.1  | 0.00  | 0.03  | 0.01 | 0.02 | 0.02 | 1.00 | 93    | 8438  | 100  | 100   |
| $\psi_7$             | 0.3  | 0.01  | 0.04  | 0.03 | 0.03 | 0.03 | 1.00 | 94    | 24739 | 100  | 100   |
| $\psi_8$             | 0.3  | 0.01  | 0.02  | 0.03 | 0.02 | 0.02 | 1.00 | 98    | 24261 | 100  | 100   |
| $\psi_9$             | 0.3  | 0.01  | 0.04  | 0.03 | 0.04 | 0.04 | 1.00 | 90    | 13950 | 99   | 100   |
| $\psi_{21}$          | -0.0 | 0.03  | -0.68 | 0.02 | 0.02 | 0.03 | 0.04 | 76    | 3437  | 100  | 100   |
| $\psi_{31}$          | 0.0  | -0.01 | -0.63 | 0.01 | 0.00 | 0.01 | 0.06 | 67    | 5219  | 100  | 100   |
| $\psi_{42}$          | 0.0  | -0.01 | -0.39 | 0.01 | 0.01 | 0.01 | 0.34 | 83    | 6233  | 100  | 100   |
| $\psi_{32}$          | 0.0  | 0.00  |       | 0.01 | 0.00 | 0.00 |      | 99    | 6653  | 99   | 100   |
| $\psi_{41}$          | 0.0  | 0.00  |       | 0.01 | 0.00 | 0.00 |      | 100   | 5769  | 100  | 100   |
| $\psi_{43}$          | 0.0  | 0.00  |       | 0.00 | 0.00 | 0.00 |      | 99    | 8510  | 99   | 100   |
| $\psi_{51}$          | 0.0  | -0.00 |       | 0.01 | 0.00 | 0.00 |      | 100   | 6281  | 100  | 100   |
| $\psi_{52}$          | 0.0  | -0.00 |       | 0.01 | 0.00 | 0.01 |      | 98    | 5980  | 100  | 100   |
| $\psi_{53}$          | 0.0  | 0.00  |       | 0.00 | 0.00 | 0.00 |      | 99    | 8463  | 99   | 100   |
| $\psi_{54}$          | 0.0  | -0.00 |       | 0.00 | 0.00 | 0.00 |      | 99    | 7673  | 99   | 100   |
| $\psi_{61}$          | 0.0  | -0.00 |       | 0.01 | 0.00 | 0.00 |      | 99    | 5454  | 100  | 100   |
| $\psi_{62}$          | 0.0  | 0.00  |       | 0.01 | 0.00 | 0.00 |      | 98    | 7203  | 100  | 100   |
| $\psi_{63}$          | 0.0  | -0.00 |       | 0.00 | 0.00 | 0.00 |      | 99    | 8360  | 100  | 100   |
| $\psi_{64}$          | 0.0  | 0.00  |       | 0.00 | 0.00 | 0.00 |      | 100   | 9161  | 100  | 100   |
| $\psi_{65}$          | 0.0  | 0.00  |       | 0.00 | 0.00 | 0.00 |      | 97    | 7450  | 100  | 100   |
| $\psi_{71}$          | 0.0  | -0.00 |       | 0.02 | 0.01 | 0.01 |      | 97    | 8039  | 100  | 100   |
| $\psi_{72}$          | 0.0  | -0.00 |       | 0.01 | 0.01 | 0.01 |      | 98    | 11235 | 100  | 100   |
| $\psi_{73}$          | 0.0  | 0.00  |       | 0.00 | 0.00 | 0.00 |      | 97    | 13834 | 99   | 100   |
| $\psi_{74}$          | 0.0  | -0.00 |       | 0.00 | 0.00 | 0.00 |      | 97    | 14393 | 100  | 100   |
| $\psi_{75}$          | 0.0  | 0.00  |       | 0.00 | 0.00 | 0.00 |      | 97    | 13402 | 100  | 100   |
| $\psi_{76}$          | 0.0  | -0.00 |       | 0.00 | 0.00 | 0.00 |      | 98    | 14941 | 100  | 100   |
| $\psi_{81}$          | 0.0  | 0.00  |       | 0.02 | 0.01 | 0.01 |      | 98    | 8780  | 100  | 100   |
| $\psi_{82}$          | 0.0  | -0.00 |       | 0.01 | 0.01 | 0.01 |      | 98    | 9612  | 100  | 100   |
| $\psi_{83}$          | 0.0  | -0.00 |       | 0.00 | 0.00 | 0.00 |      | 97    | 14174 | 100  | 100   |

*Continued on next page*

Table S2 – *Continued from previous page*

| Par              | True | Bias  | RBias | SE   | MCSE | RMSE | SENS | CR(%) | ESS   | %ESS | %Rhat |
|------------------|------|-------|-------|------|------|------|------|-------|-------|------|-------|
| $\psi_{84}$      | 0.0  | -0.00 |       | 0.00 | 0.00 | 0.00 |      | 98    | 13714 | 100  | 100   |
| $\psi_{85}$      | 0.0  | -0.00 |       | 0.00 | 0.00 | 0.00 |      | 97    | 13643 | 100  | 100   |
| $\psi_{86}$      | 0.0  | -0.00 |       | 0.00 | 0.00 | 0.00 |      | 98    | 14956 | 100  | 100   |
| $\psi_{87}$      | 0.0  | 0.00  |       | 0.01 | 0.01 | 0.01 |      | 96    | 23551 | 99   | 100   |
| $\psi_{91}$      | 0.0  | -0.00 |       | 0.02 | 0.01 | 0.01 |      | 99    | 7426  | 100  | 100   |
| $\psi_{92}$      | 0.0  | -0.00 |       | 0.02 | 0.01 | 0.01 |      | 98    | 9017  | 100  | 100   |
| $\psi_{93}$      | 0.0  | -0.00 |       | 0.00 | 0.00 | 0.00 |      | 96    | 11360 | 99   | 100   |
| $\psi_{94}$      | 0.0  | -0.00 |       | 0.01 | 0.00 | 0.00 |      | 95    | 11190 | 100  | 100   |
| $\psi_{95}$      | 0.0  | -0.00 |       | 0.01 | 0.00 | 0.00 |      | 99    | 11340 | 100  | 100   |
| $\psi_{96}$      | 0.0  | 0.00  |       | 0.01 | 0.00 | 0.00 |      | 99    | 11929 | 99   | 100   |
| $\psi_{97}$      | 0.0  | -0.00 |       | 0.01 | 0.01 | 0.01 |      | 96    | 18726 | 98   | 100   |
| $\psi_{98}$      | 0.0  | -0.00 |       | 0.01 | 0.01 | 0.01 |      | 96    | 19221 | 98   | 100   |
| $\mu_{1,i}$      |      | -0.00 | -3.26 | 0.24 | 0.33 | 0.29 | 0.54 | 89    | 10106 | 100  | 100   |
| $\mu_{2,i}$      |      | -0.01 | -0.04 | 0.23 | 0.35 | 0.26 | 0.59 | 91    | 12560 | 99   | 100   |
| $a_{1,i}$        |      | 0.00  | 0.04  | 0.07 | 0.18 | 0.08 | 0.99 | 93    | 18101 | 99   | 100   |
| $a_{2,i}$        |      | -0.00 | -5.45 | 0.07 | 0.20 | 0.08 | 0.97 | 94    | 17562 | 99   | 100   |
| $b_{1,i}$        |      | 0.01  | -0.28 | 0.07 | 0.22 | 0.08 | 0.53 | 93    | 17486 | 99   | 100   |
| $b_{2,i}$        |      | -0.00 | 0.01  | 0.07 | 0.21 | 0.08 | 0.51 | 94    | 18689 | 99   | 100   |
| $\sigma_{1,i}^2$ |      | 0.03  | 0.06  | 0.83 | 3.92 | 1.20 | 1.00 | 95    | 20829 | 99   | 100   |
| $\sigma_{2,i}^2$ |      | 0.02  | 0.06  | 0.82 | 3.60 | 1.15 | 1.00 | 95    | 21333 | 99   | 100   |
| $r_i$            |      | -0.00 | -0.08 | 0.12 | 0.29 | 0.13 | 0.69 | 94    | 17072 | 99   | 100   |

Table S3

*Simulation results for Stan under the low stability condition ( $N = 60$  persons,  $T = 100$  time points)*

| Par                  | True | Bias  | RBias | SE   | MCSE | RMSE | SENS | CR(%) | ESS   | %ESS | %Rhat |
|----------------------|------|-------|-------|------|------|------|------|-------|-------|------|-------|
| $\mu_1$              | 0.5  | 0.00  | 0.00  | 0.06 | 0.05 | 0.05 | 1.00 | 95    | 17496 | 100  | 100   |
| $\alpha_{\mu_1}$     | -0.3 | -0.00 | 0.01  | 0.06 | 0.06 | 0.06 | 1.00 | 97    | 12884 | 100  | 100   |
| $\mu_2$              | 0.5  | -0.01 | -0.03 | 0.06 | 0.06 | 0.06 | 1.00 | 93    | 16952 | 100  | 100   |
| $\alpha_{\mu_2}$     | 0.3  | -0.00 | -0.01 | 0.06 | 0.06 | 0.06 | 1.00 | 95    | 13656 | 99   | 100   |
| $a_1$                | 0.3  | 0.00  | 0.00  | 0.02 | 0.02 | 0.02 | 1.00 | 93    | 15539 | 99   | 100   |
| $\alpha_{a_1}$       | -0.2 | 0.00  | -0.01 | 0.02 | 0.02 | 0.02 | 1.00 | 95    | 20830 | 100  | 100   |
| $a_2$                | 0.3  | -0.00 | -0.00 | 0.02 | 0.02 | 0.02 | 1.00 | 94    | 16231 | 100  | 100   |
| $\alpha_{a_2}$       | 0.2  | -0.00 | -0.00 | 0.02 | 0.02 | 0.02 | 1.00 | 91    | 21617 | 99   | 100   |
| $b_1$                | -0.1 | 0.00  | -0.01 | 0.02 | 0.02 | 0.02 | 1.00 | 94    | 13227 | 100  | 100   |
| $\alpha_{b_1}$       | -0.2 | -0.00 | 0.00  | 0.02 | 0.02 | 0.02 | 1.00 | 95    | 15797 | 100  | 100   |
| $b_2$                | -0.1 | 0.00  | -0.00 | 0.02 | 0.02 | 0.02 | 1.00 | 97    | 13078 | 100  | 100   |
| $\alpha_{b_2}$       | 0.2  | 0.00  | 0.01  | 0.02 | 0.02 | 0.02 | 1.00 | 95    | 15716 | 100  | 100   |
| $l\sigma_1$          | 0.5  | -0.00 | -0.00 | 0.04 | 0.04 | 0.04 | 1.00 | 93    | 40940 | 100  | 100   |
| $\alpha_{l\sigma_1}$ | -0.3 | -0.00 | 0.01  | 0.04 | 0.04 | 0.04 | 1.00 | 96    | 40869 | 100  | 100   |
| $l\sigma_2$          | 0.5  | -0.00 | -0.00 | 0.04 | 0.04 | 0.04 | 1.00 | 97    | 41649 | 100  | 100   |
| $\alpha_{l\sigma_2}$ | 0.3  | -0.00 | -0.02 | 0.04 | 0.04 | 0.04 | 1.00 | 98    | 42263 | 99   | 100   |
| $z$                  | 0.5  | -0.00 | -0.01 | 0.05 | 0.04 | 0.04 | 1.00 | 97    | 32263 | 99   | 100   |
| $\alpha_z$           | -0.3 | 0.00  | -0.01 | 0.05 | 0.04 | 0.04 | 1.00 | 97    | 33011 | 100  | 100   |
| $\psi_1$             | 0.3  | -0.00 | -0.00 | 0.05 | 0.05 | 0.05 | 1.00 | 92    | 12359 | 100  | 100   |
| $\psi_2$             | 0.3  | -0.00 | -0.02 | 0.05 | 0.05 | 0.05 | 1.00 | 97    | 13972 | 100  | 100   |
| $\psi_3$             | 0.1  | -0.00 | -0.01 | 0.02 | 0.02 | 0.02 | 1.00 | 92    | 6819  | 99   | 100   |
| $\psi_4$             | 0.1  | 0.00  | 0.02  | 0.02 | 0.02 | 0.02 | 1.00 | 95    | 8527  | 99   | 100   |
| $\psi_5$             | 0.1  | 0.00  | 0.04  | 0.02 | 0.02 | 0.02 | 1.00 | 90    | 9231  | 100  | 100   |
| $\psi_6$             | 0.1  | 0.00  | 0.03  | 0.02 | 0.02 | 0.02 | 1.00 | 92    | 9645  | 98   | 100   |
| $\psi_7$             | 0.3  | 0.01  | 0.04  | 0.03 | 0.03 | 0.03 | 1.00 | 91    | 36809 | 100  | 100   |
| $\psi_8$             | 0.3  | 0.02  | 0.06  | 0.03 | 0.03 | 0.04 | 1.00 | 94    | 37193 | 99   | 100   |
| $\psi_9$             | 0.3  | 0.02  | 0.05  | 0.04 | 0.03 | 0.04 | 1.00 | 95    | 23261 | 99   | 100   |
| $\psi_{21}$          | -0.0 | 0.02  | -0.38 | 0.02 | 0.02 | 0.02 | 0.30 | 82    | 13844 | 100  | 100   |
| $\psi_{31}$          | 0.0  | -0.01 | -0.42 | 0.01 | 0.01 | 0.01 | 0.22 | 83    | 11763 | 99   | 100   |
| $\psi_{42}$          | 0.0  | -0.01 | -0.36 | 0.01 | 0.01 | 0.01 | 0.30 | 89    | 13253 | 100  | 100   |
| $\psi_{32}$          | 0.0  | 0.00  |       | 0.01 | 0.00 | 0.00 |      | 99    | 13709 | 100  | 100   |
| $\psi_{41}$          | 0.0  | 0.00  |       | 0.01 | 0.00 | 0.01 |      | 98    | 13103 | 100  | 100   |
| $\psi_{43}$          | 0.0  | 0.00  |       | 0.00 | 0.00 | 0.00 |      | 100   | 12626 | 100  | 100   |
| $\psi_{51}$          | 0.0  | -0.00 |       | 0.01 | 0.01 | 0.01 |      | 100   | 14541 | 100  | 100   |
| $\psi_{52}$          | 0.0  | -0.00 |       | 0.01 | 0.01 | 0.01 |      | 100   | 12063 | 100  | 100   |
| $\psi_{53}$          | 0.0  | -0.00 |       | 0.00 | 0.00 | 0.00 |      | 99    | 11792 | 100  | 100   |
| $\psi_{54}$          | 0.0  | 0.00  |       | 0.00 | 0.00 | 0.00 |      | 100   | 11704 | 100  | 100   |
| $\psi_{61}$          | 0.0  | -0.00 |       | 0.01 | 0.00 | 0.01 |      | 99    | 11546 | 100  | 100   |
| $\psi_{62}$          | 0.0  | 0.00  |       | 0.01 | 0.00 | 0.00 |      | 100   | 14592 | 100  | 100   |
| $\psi_{63}$          | 0.0  | -0.00 |       | 0.00 | 0.00 | 0.00 |      | 100   | 11945 | 100  | 100   |
| $\psi_{64}$          | 0.0  | 0.00  |       | 0.00 | 0.00 | 0.00 |      | 100   | 13230 | 100  | 100   |
| $\psi_{65}$          | 0.0  | -0.00 |       | 0.00 | 0.00 | 0.00 |      | 99    | 10459 | 100  | 100   |
| $\psi_{71}$          | 0.0  | 0.00  |       | 0.02 | 0.01 | 0.01 |      | 98    | 19680 | 100  | 100   |
| $\psi_{72}$          | 0.0  | -0.00 |       | 0.02 | 0.01 | 0.01 |      | 96    | 23033 | 99   | 100   |
| $\psi_{73}$          | 0.0  | -0.00 |       | 0.01 | 0.00 | 0.00 |      | 99    | 18828 | 100  | 100   |
| $\psi_{74}$          | 0.0  | 0.00  |       | 0.01 | 0.00 | 0.00 |      | 100   | 19745 | 100  | 100   |
| $\psi_{75}$          | 0.0  | -0.00 |       | 0.01 | 0.00 | 0.00 |      | 98    | 18616 | 99   | 100   |
| $\psi_{76}$          | 0.0  | 0.00  |       | 0.01 | 0.00 | 0.00 |      | 98    | 19094 | 100  | 100   |
| $\psi_{81}$          | 0.0  | -0.00 |       | 0.02 | 0.01 | 0.01 |      | 96    | 22790 | 100  | 100   |
| $\psi_{82}$          | 0.0  | 0.00  |       | 0.02 | 0.01 | 0.01 |      | 97    | 20830 | 100  | 100   |
| $\psi_{83}$          | 0.0  | -0.00 |       | 0.01 | 0.00 | 0.00 |      | 98    | 18679 | 100  | 100   |

*Continued on next page*



Table S3 – *Continued from previous page*

| Par              | True | Bias  | RBias | SE   | MCSE | RMSE | SENS | CR(%) | ESS   | %ESS | %Rhat |
|------------------|------|-------|-------|------|------|------|------|-------|-------|------|-------|
| $\psi_{84}$      | 0.0  | -0.00 |       | 0.01 | 0.00 | 0.00 |      | 98    | 19714 | 100  | 100   |
| $\psi_{85}$      | 0.0  | -0.00 |       | 0.01 | 0.00 | 0.00 |      | 100   | 18435 | 100  | 100   |
| $\psi_{86}$      | 0.0  | 0.00  |       | 0.01 | 0.01 | 0.01 |      | 98    | 19470 | 100  | 100   |
| $\psi_{87}$      | 0.0  | 0.00  |       | 0.01 | 0.01 | 0.01 |      | 96    | 31676 | 100  | 100   |
| $\psi_{91}$      | 0.0  | 0.00  |       | 0.02 | 0.01 | 0.01 |      | 98    | 19186 | 99   | 100   |
| $\psi_{92}$      | 0.0  | -0.00 |       | 0.02 | 0.01 | 0.01 |      | 98    | 19823 | 98   | 100   |
| $\psi_{93}$      | 0.0  | 0.00  |       | 0.01 | 0.00 | 0.00 |      | 98    | 16374 | 100  | 100   |
| $\psi_{94}$      | 0.0  | -0.00 |       | 0.01 | 0.01 | 0.01 |      | 98    | 16847 | 100  | 100   |
| $\psi_{95}$      | 0.0  | 0.00  |       | 0.01 | 0.00 | 0.00 |      | 98    | 16451 | 100  | 100   |
| $\psi_{96}$      | 0.0  | 0.00  |       | 0.01 | 0.00 | 0.00 |      | 99    | 17243 | 100  | 100   |
| $\psi_{97}$      | 0.0  | -0.00 |       | 0.01 | 0.01 | 0.01 |      | 96    | 27771 | 100  | 100   |
| $\psi_{98}$      | 0.0  | -0.00 |       | 0.01 | 0.01 | 0.01 |      | 97    | 27850 | 100  | 100   |
| $\mu_{1,i}$      |      | -0.00 | 0.57  | 0.20 | 0.38 | 0.21 | 0.68 | 94    | 25514 | 100  | 100   |
| $\mu_{2,i}$      |      | -0.01 | 1.78  | 0.19 | 0.38 | 0.20 | 0.71 | 94    | 26298 | 100  | 100   |
| $a_{1,i}$        |      | 0.00  | 0.80  | 0.07 | 0.21 | 0.08 | 0.79 | 93    | 20305 | 100  | 100   |
| $a_{2,i}$        |      | 0.00  | 0.97  | 0.07 | 0.21 | 0.07 | 0.80 | 94    | 21713 | 100  | 100   |
| $b_{1,i}$        |      | 0.00  | -1.08 | 0.07 | 0.21 | 0.08 | 0.50 | 94    | 20914 | 100  | 100   |
| $b_{2,i}$        |      | -0.00 | -0.51 | 0.07 | 0.21 | 0.08 | 0.51 | 93    | 21205 | 100  | 100   |
| $\sigma_{1,i}^2$ |      | 0.01  | 0.03  | 0.64 | 3.71 | 0.83 | 1.00 | 95    | 27219 | 100  | 100   |
| $\sigma_{2,i}^2$ |      | 0.02  | 0.03  | 0.65 | 3.74 | 0.86 | 1.00 | 95    | 27834 | 100  | 100   |
| $r_i$            |      | 0.00  | 0.07  | 0.10 | 0.30 | 0.10 | 0.75 | 95    | 21323 | 100  | 100   |

Table S4

*Simulation results for Stan under the high stability condition ( $N = 60$  persons,  $T = 100$  time points)*

| Par                  | True | Bias  | RBias | SE   | MCSE | RMSE | SENS | CR(%) | ESS   | %ESS | %Rhat |
|----------------------|------|-------|-------|------|------|------|------|-------|-------|------|-------|
| $\mu_1$              | 0.5  | -0.03 | -0.05 | 0.08 | 0.08 | 0.08 | 1.00 | 95    | 8136  | 100  | 99    |
| $\alpha_{\mu_1}$     | -0.3 | 0.03  | -0.09 | 0.09 | 0.09 | 0.09 | 0.84 | 88    | 6025  | 99   | 99    |
| $\mu_2$              | 0.5  | -0.01 | -0.02 | 0.07 | 0.07 | 0.07 | 1.00 | 90    | 9955  | 99   | 99    |
| $\alpha_{\mu_2}$     | 0.3  | -0.01 | -0.03 | 0.08 | 0.08 | 0.08 | 0.96 | 96    | 6714  | 100  | 99    |
| $a_1$                | 0.6  | -0.01 | -0.02 | 0.02 | 0.02 | 0.02 | 1.00 | 89    | 17900 | 99   | 100   |
| $\alpha_{a_1}$       | -0.2 | 0.03  | -0.16 | 0.02 | 0.02 | 0.04 | 1.00 | 46    | 21208 | 99   | 99    |
| $a_2$                | 0.5  | -0.01 | -0.01 | 0.02 | 0.02 | 0.02 | 1.00 | 95    | 16873 | 100  | 98    |
| $\alpha_{a_2}$       | 0.2  | -0.02 | -0.08 | 0.02 | 0.02 | 0.02 | 1.00 | 85    | 20844 | 99   | 99    |
| $b_1$                | -0.1 | 0.00  | -0.04 | 0.02 | 0.02 | 0.02 | 1.00 | 95    | 14359 | 100  | 100   |
| $\alpha_{b_1}$       | -0.2 | -0.00 | 0.02  | 0.02 | 0.02 | 0.02 | 1.00 | 98    | 16333 | 99   | 99    |
| $b_2$                | -0.1 | -0.01 | 0.06  | 0.02 | 0.02 | 0.02 | 1.00 | 91    | 15250 | 100  | 100   |
| $\alpha_{b_2}$       | 0.2  | 0.00  | 0.01  | 0.02 | 0.02 | 0.02 | 1.00 | 95    | 17142 | 99   | 99    |
| $l\sigma_1$          | 0.5  | 0.00  | 0.00  | 0.04 | 0.04 | 0.04 | 1.00 | 95    | 36869 | 98   | 99    |
| $\alpha_{l\sigma_1}$ | -0.3 | -0.00 | 0.01  | 0.04 | 0.04 | 0.04 | 1.00 | 96    | 36562 | 99   | 100   |
| $l\sigma_2$          | 0.5  | 0.00  | 0.00  | 0.04 | 0.04 | 0.04 | 1.00 | 99    | 36851 | 99   | 99    |
| $\alpha_{l\sigma_2}$ | 0.3  | -0.01 | -0.02 | 0.04 | 0.04 | 0.04 | 1.00 | 99    | 37713 | 97   | 98    |
| $z$                  | 0.5  | -0.00 | -0.01 | 0.05 | 0.04 | 0.04 | 1.00 | 97    | 29779 | 99   | 100   |
| $\alpha_z$           | -0.3 | 0.01  | -0.04 | 0.05 | 0.04 | 0.04 | 1.00 | 98    | 29441 | 99   | 99    |
| $\psi_1$             | 0.3  | -0.02 | -0.08 | 0.08 | 0.07 | 0.08 | 1.00 | 98    | 4124  | 92   | 99    |
| $\psi_2$             | 0.3  | -0.02 | -0.05 | 0.06 | 0.06 | 0.06 | 1.00 | 97    | 6645  | 99   | 99    |
| $\psi_3$             | 0.1  | -0.00 | -0.02 | 0.02 | 0.02 | 0.02 | 1.00 | 96    | 10479 | 100  | 99    |
| $\psi_4$             | 0.1  | -0.00 | -0.00 | 0.02 | 0.02 | 0.02 | 1.00 | 93    | 9774  | 100  | 99    |
| $\psi_5$             | 0.1  | 0.00  | 0.02  | 0.02 | 0.02 | 0.02 | 1.00 | 89    | 10576 | 100  | 100   |
| $\psi_6$             | 0.1  | 0.00  | 0.02  | 0.02 | 0.02 | 0.02 | 1.00 | 96    | 12650 | 99   | 100   |
| $\psi_7$             | 0.3  | 0.02  | 0.05  | 0.03 | 0.03 | 0.03 | 1.00 | 97    | 30924 | 99   | 99    |
| $\psi_8$             | 0.3  | 0.02  | 0.06  | 0.03 | 0.03 | 0.04 | 1.00 | 91    | 32780 | 98   | 100   |
| $\psi_9$             | 0.3  | 0.02  | 0.06  | 0.04 | 0.04 | 0.04 | 1.00 | 91    | 21044 | 99   | 99    |
| $\psi_{21}$          | -0.0 | 0.03  | -0.56 | 0.02 | 0.02 | 0.03 | 0.05 | 86    | 6621  | 100  | 100   |
| $\psi_{31}$          | 0.0  | -0.01 | -0.49 | 0.01 | 0.01 | 0.01 | 0.15 | 77    | 9718  | 99   | 100   |
| $\psi_{42}$          | 0.0  | -0.01 | -0.40 | 0.01 | 0.01 | 0.01 | 0.21 | 84    | 10881 | 99   | 100   |
| $\psi_{32}$          | 0.0  | 0.00  |       | 0.01 | 0.00 | 0.01 |      | 98    | 11603 | 99   | 99    |
| $\psi_{41}$          | 0.0  | 0.00  |       | 0.01 | 0.00 | 0.00 |      | 100   | 10017 | 100  | 100   |
| $\psi_{43}$          | 0.0  | 0.00  |       | 0.00 | 0.00 | 0.00 |      | 100   | 14558 | 100  | 99    |
| $\psi_{51}$          | 0.0  | -0.00 |       | 0.01 | 0.00 | 0.00 |      | 100   | 10555 | 99   | 100   |
| $\psi_{52}$          | 0.0  | -0.00 |       | 0.01 | 0.01 | 0.01 |      | 99    | 10140 | 98   | 99    |
| $\psi_{53}$          | 0.0  | -0.00 |       | 0.00 | 0.00 | 0.00 |      | 99    | 13705 | 99   | 100   |
| $\psi_{54}$          | 0.0  | 0.00  |       | 0.00 | 0.00 | 0.00 |      | 99    | 12215 | 98   | 99    |
| $\psi_{61}$          | 0.0  | -0.00 |       | 0.01 | 0.00 | 0.00 |      | 100   | 9392  | 100  | 100   |
| $\psi_{62}$          | 0.0  | -0.00 |       | 0.01 | 0.00 | 0.00 |      | 99    | 11725 | 100  | 99    |
| $\psi_{63}$          | 0.0  | -0.00 |       | 0.00 | 0.00 | 0.00 |      | 99    | 14039 | 98   | 100   |
| $\psi_{64}$          | 0.0  | -0.00 |       | 0.00 | 0.00 | 0.00 |      | 100   | 14588 | 99   | 100   |
| $\psi_{65}$          | 0.0  | 0.00  |       | 0.00 | 0.00 | 0.00 |      | 100   | 11837 | 100  | 100   |
| $\psi_{71}$          | 0.0  | -0.00 |       | 0.02 | 0.01 | 0.01 |      | 100   | 13446 | 99   | 100   |
| $\psi_{72}$          | 0.0  | 0.00  |       | 0.02 | 0.01 | 0.01 |      | 99    | 16038 | 96   | 100   |
| $\psi_{73}$          | 0.0  | 0.00  |       | 0.01 | 0.00 | 0.00 |      | 95    | 20760 | 99   | 99    |
| $\psi_{74}$          | 0.0  | 0.00  |       | 0.01 | 0.00 | 0.00 |      | 99    | 20029 | 99   | 100   |
| $\psi_{75}$          | 0.0  | -0.00 |       | 0.01 | 0.00 | 0.00 |      | 97    | 18623 | 99   | 100   |
| $\psi_{76}$          | 0.0  | -0.00 |       | 0.01 | 0.00 | 0.00 |      | 100   | 20683 | 100  | 100   |
| $\psi_{81}$          | 0.0  | 0.00  |       | 0.02 | 0.01 | 0.01 |      | 100   | 14951 | 100  | 99    |
| $\psi_{82}$          | 0.0  | -0.00 |       | 0.02 | 0.01 | 0.01 |      | 99    | 15308 | 98   | 99    |
| $\psi_{83}$          | 0.0  | -0.00 |       | 0.01 | 0.00 | 0.00 |      | 96    | 20965 | 98   | 100   |

*Continued on next page*

Table S4 – *Continued from previous page*

| Par              | True | Bias  | RBias | SE   | MCSE | RMSE | SENS | CR(%) | ESS   | %ESS | %Rhat |
|------------------|------|-------|-------|------|------|------|------|-------|-------|------|-------|
| $\psi_{84}$      | 0.0  | -0.00 |       | 0.01 | 0.01 | 0.01 |      | 96    | 20169 | 99   | 100   |
| $\psi_{85}$      | 0.0  | -0.00 |       | 0.01 | 0.00 | 0.00 |      | 98    | 19271 | 98   | 100   |
| $\psi_{86}$      | 0.0  | -0.00 |       | 0.01 | 0.00 | 0.00 |      | 99    | 20378 | 99   | 100   |
| $\psi_{87}$      | 0.0  | 0.00  |       | 0.01 | 0.01 | 0.01 |      | 96    | 29214 | 99   | 99    |
| $\psi_{91}$      | 0.0  | -0.00 |       | 0.02 | 0.01 | 0.01 |      | 98    | 13383 | 99   | 99    |
| $\psi_{92}$      | 0.0  | 0.00  |       | 0.02 | 0.01 | 0.01 |      | 99    | 14463 | 100  | 99    |
| $\psi_{93}$      | 0.0  | 0.00  |       | 0.01 | 0.00 | 0.00 |      | 100   | 17520 | 99   | 99    |
| $\psi_{94}$      | 0.0  | -0.00 |       | 0.01 | 0.00 | 0.00 |      | 95    | 17152 | 99   | 99    |
| $\psi_{95}$      | 0.0  | 0.00  |       | 0.01 | 0.00 | 0.00 |      | 98    | 15728 | 99   | 100   |
| $\psi_{96}$      | 0.0  | 0.00  |       | 0.01 | 0.00 | 0.00 |      | 98    | 18273 | 99   | 100   |
| $\psi_{97}$      | 0.0  | -0.00 |       | 0.01 | 0.01 | 0.01 |      | 99    | 25448 | 99   | 99    |
| $\psi_{98}$      | 0.0  | -0.00 |       | 0.01 | 0.01 | 0.01 |      | 98    | 25364 | 99   | 99    |
| $\mu_{1,i}$      |      | -0.01 | 0.08  | 0.24 | 0.34 | 0.27 | 0.55 | 91    | 14547 | 100  | 99    |
| $\mu_{2,i}$      |      | -0.00 | 0.21  | 0.21 | 0.37 | 0.25 | 0.64 | 92    | 16547 | 99   | 99    |
| $a_{1,i}$        |      | -0.00 | 0.02  | 0.06 | 0.18 | 0.07 | 0.99 | 93    | 22500 | 99   | 99    |
| $a_{2,i}$        |      | -0.00 | 0.05  | 0.06 | 0.20 | 0.07 | 0.97 | 94    | 21375 | 99   | 100   |
| $b_{1,i}$        |      | 0.00  | -0.23 | 0.07 | 0.22 | 0.07 | 0.56 | 93    | 20993 | 99   | 100   |
| $b_{2,i}$        |      | -0.00 | -0.90 | 0.06 | 0.21 | 0.07 | 0.55 | 93    | 22268 | 99   | 99    |
| $\sigma_{1,i}^2$ |      | -0.00 | 0.03  | 0.64 | 3.73 | 0.80 | 1.00 | 95    | 24688 | 99   | 99    |
| $\sigma_{2,i}^2$ |      | 0.01  | 0.03  | 0.65 | 3.70 | 0.84 | 1.00 | 95    | 25203 | 99   | 99    |
| $r_i$            |      | 0.00  | 0.79  | 0.10 | 0.30 | 0.10 | 0.76 | 94    | 19382 | 99   | 100   |

Table S5

*Simulation results for Stan under the high stability condition ( $N = 200$  persons,  $T = 100$  time points)*

| Par                  | True | Bias  | RBias | SE   | MCSE | RMSE | SENS | CR(%) | ESS   | %ESS | %Rhat |
|----------------------|------|-------|-------|------|------|------|------|-------|-------|------|-------|
| $\mu_1$              | 0.5  | -0.02 | -0.05 | 0.04 | 0.04 | 0.05 | 1.00 | 92    | 7134  | 100  | 100   |
| $\alpha_{\mu_1}$     | -0.3 | 0.02  | -0.07 | 0.05 | 0.05 | 0.05 | 1.00 | 92    | 5281  | 100  | 100   |
| $\mu_2$              | 0.5  | -0.01 | -0.03 | 0.04 | 0.04 | 0.04 | 1.00 | 93    | 10061 | 100  | 100   |
| $\alpha_{\mu_2}$     | 0.3  | -0.01 | -0.02 | 0.04 | 0.04 | 0.04 | 1.00 | 93    | 6132  | 100  | 100   |
| $a_1$                | 0.6  | -0.02 | -0.03 | 0.01 | 0.01 | 0.02 | 1.00 | 56    | 22616 | 100  | 100   |
| $\alpha_{a_1}$       | -0.2 | 0.03  | -0.14 | 0.01 | 0.01 | 0.03 | 1.00 | 8     | 27574 | 100  | 100   |
| $a_2$                | 0.5  | -0.01 | -0.01 | 0.01 | 0.01 | 0.01 | 1.00 | 93    | 20893 | 100  | 100   |
| $\alpha_{a_2}$       | 0.2  | -0.01 | -0.07 | 0.01 | 0.01 | 0.02 | 1.00 | 66    | 26360 | 100  | 100   |
| $b_1$                | -0.1 | 0.00  | -0.04 | 0.01 | 0.01 | 0.01 | 1.00 | 95    | 16174 | 100  | 100   |
| $\alpha_{b_1}$       | -0.2 | -0.00 | 0.02  | 0.01 | 0.01 | 0.01 | 1.00 | 91    | 19055 | 100  | 100   |
| $b_2$                | -0.1 | -0.00 | 0.01  | 0.01 | 0.01 | 0.01 | 1.00 | 98    | 17437 | 100  | 100   |
| $\alpha_{b_2}$       | 0.2  | 0.00  | 0.00  | 0.01 | 0.01 | 0.01 | 1.00 | 98    | 20036 | 100  | 100   |
| $l\sigma_1$          | 0.5  | 0.00  | 0.00  | 0.02 | 0.03 | 0.03 | 1.00 | 92    | 55146 | 100  | 100   |
| $\alpha_{l\sigma_1}$ | -0.3 | -0.00 | 0.01  | 0.02 | 0.02 | 0.02 | 1.00 | 93    | 53758 | 100  | 100   |
| $l\sigma_2$          | 0.5  | -0.00 | -0.00 | 0.02 | 0.02 | 0.02 | 1.00 | 95    | 54669 | 100  | 100   |
| $\alpha_{l\sigma_2}$ | 0.3  | 0.00  | 0.01  | 0.02 | 0.02 | 0.02 | 1.00 | 96    | 55294 | 100  | 100   |
| $z$                  | 0.5  | 0.00  | 0.00  | 0.02 | 0.02 | 0.02 | 1.00 | 96    | 39291 | 100  | 100   |
| $\alpha_z$           | -0.3 | 0.00  | -0.00 | 0.02 | 0.02 | 0.02 | 1.00 | 95    | 38958 | 100  | 100   |
| $\psi_1$             | 0.3  | -0.01 | -0.05 | 0.04 | 0.05 | 0.05 | 1.00 | 87    | 4219  | 100  | 100   |
| $\psi_2$             | 0.3  | -0.00 | -0.02 | 0.03 | 0.03 | 0.03 | 1.00 | 97    | 7531  | 100  | 100   |
| $\psi_3$             | 0.1  | -0.00 | -0.04 | 0.01 | 0.01 | 0.01 | 1.00 | 92    | 12458 | 100  | 100   |
| $\psi_4$             | 0.1  | -0.00 | -0.02 | 0.01 | 0.01 | 0.01 | 1.00 | 95    | 11320 | 100  | 100   |
| $\psi_5$             | 0.1  | 0.00  | 0.01  | 0.01 | 0.01 | 0.01 | 1.00 | 95    | 12179 | 100  | 100   |
| $\psi_6$             | 0.1  | 0.00  | 0.03  | 0.01 | 0.01 | 0.01 | 1.00 | 95    | 14871 | 100  | 100   |
| $\psi_7$             | 0.3  | 0.01  | 0.02  | 0.02 | 0.02 | 0.02 | 1.00 | 95    | 46686 | 100  | 100   |
| $\psi_8$             | 0.3  | 0.01  | 0.02  | 0.02 | 0.02 | 0.02 | 1.00 | 96    | 47555 | 100  | 100   |
| $\psi_9$             | 0.3  | 0.00  | 0.02  | 0.02 | 0.02 | 0.02 | 1.00 | 91    | 26495 | 100  | 100   |
| $\psi_{21}$          | -0.0 | 0.01  | -0.24 | 0.02 | 0.02 | 0.02 | 0.59 | 88    | 4070  | 100  | 100   |
| $\psi_{31}$          | 0.0  | -0.00 | -0.23 | 0.00 | 0.00 | 0.01 | 0.84 | 89    | 6977  | 100  | 100   |
| $\psi_{42}$          | 0.0  | -0.00 | -0.16 | 0.00 | 0.00 | 0.00 | 0.95 | 93    | 8547  | 100  | 100   |
| $\psi_{32}$          | 0.0  | 0.00  |       | 0.00 | 0.00 | 0.00 |      | 98    | 9589  | 100  | 100   |
| $\psi_{41}$          | 0.0  | 0.00  |       | 0.00 | 0.00 | 0.00 |      | 96    | 6882  | 100  | 100   |
| $\psi_{43}$          | 0.0  | 0.00  |       | 0.00 | 0.00 | 0.00 |      | 94    | 13452 | 100  | 100   |
| $\psi_{51}$          | 0.0  | -0.00 |       | 0.00 | 0.00 | 0.00 |      | 98    | 7594  | 100  | 100   |
| $\psi_{52}$          | 0.0  | -0.00 |       | 0.00 | 0.00 | 0.00 |      | 99    | 7089  | 100  | 100   |
| $\psi_{53}$          | 0.0  | 0.00  |       | 0.00 | 0.00 | 0.00 |      | 98    | 13073 | 100  | 100   |
| $\psi_{54}$          | 0.0  | -0.00 |       | 0.00 | 0.00 | 0.00 |      | 98    | 11487 | 100  | 100   |
| $\psi_{61}$          | 0.0  | -0.00 |       | 0.00 | 0.00 | 0.00 |      | 98    | 5956  | 100  | 100   |
| $\psi_{62}$          | 0.0  | 0.00  |       | 0.00 | 0.00 | 0.00 |      | 95    | 9709  | 100  | 100   |
| $\psi_{63}$          | 0.0  | -0.00 |       | 0.00 | 0.00 | 0.00 |      | 99    | 13236 | 100  | 100   |
| $\psi_{64}$          | 0.0  | 0.00  |       | 0.00 | 0.00 | 0.00 |      | 99    | 13432 | 100  | 100   |
| $\psi_{65}$          | 0.0  | -0.00 |       | 0.00 | 0.00 | 0.00 |      | 97    | 10649 | 100  | 100   |
| $\psi_{71}$          | 0.0  | -0.00 |       | 0.01 | 0.01 | 0.01 |      | 98    | 11617 | 100  | 100   |
| $\psi_{72}$          | 0.0  | -0.00 |       | 0.01 | 0.01 | 0.01 |      | 95    | 17489 | 100  | 100   |
| $\psi_{73}$          | 0.0  | -0.00 |       | 0.00 | 0.00 | 0.00 |      | 95    | 24303 | 100  | 100   |
| $\psi_{74}$          | 0.0  | -0.00 |       | 0.00 | 0.00 | 0.00 |      | 94    | 23151 | 100  | 100   |
| $\psi_{75}$          | 0.0  | 0.00  |       | 0.00 | 0.00 | 0.00 |      | 98    | 21851 | 100  | 100   |

*Continued on next page*

Table S5 – *Continued from previous page*

| Par              | True | Bias  | RBias | SE   | MCSE | RMSE | SENS | CR(%) | ESS   | %ESS | %Rhat |
|------------------|------|-------|-------|------|------|------|------|-------|-------|------|-------|
| $\psi_{76}$      | 0.0  | 0.00  |       | 0.00 | 0.00 | 0.00 |      | 95    | 24592 | 100  | 100   |
| $\psi_{81}$      | 0.0  | 0.00  |       | 0.01 | 0.01 | 0.01 |      | 98    | 13198 | 100  | 100   |
| $\psi_{82}$      | 0.0  | -0.00 |       | 0.01 | 0.01 | 0.01 |      | 97    | 15848 | 100  | 100   |
| $\psi_{83}$      | 0.0  | -0.00 |       | 0.00 | 0.00 | 0.00 |      | 96    | 24432 | 100  | 100   |
| $\psi_{84}$      | 0.0  | 0.00  |       | 0.00 | 0.00 | 0.00 |      | 95    | 23354 | 100  | 100   |
| $\psi_{85}$      | 0.0  | 0.00  |       | 0.00 | 0.00 | 0.00 |      | 94    | 21883 | 100  | 100   |
| $\psi_{86}$      | 0.0  | -0.00 |       | 0.00 | 0.00 | 0.00 |      | 96    | 24784 | 100  | 100   |
| $\psi_{87}$      | 0.0  | 0.00  |       | 0.01 | 0.01 | 0.01 |      | 99    | 41755 | 100  | 100   |
| $\psi_{91}$      | 0.0  | -0.00 |       | 0.01 | 0.01 | 0.01 |      | 97    | 11352 | 100  | 100   |
| $\psi_{92}$      | 0.0  | 0.00  |       | 0.01 | 0.01 | 0.01 |      | 96    | 14753 | 100  | 100   |
| $\psi_{93}$      | 0.0  | 0.00  |       | 0.00 | 0.00 | 0.00 |      | 94    | 19179 | 100  | 100   |
| $\psi_{94}$      | 0.0  | 0.00  |       | 0.00 | 0.00 | 0.00 |      | 99    | 18206 | 100  | 100   |
| $\psi_{95}$      | 0.0  | 0.00  |       | 0.00 | 0.00 | 0.00 |      | 100   | 18439 | 100  | 100   |
| $\psi_{96}$      | 0.0  | 0.00  |       | 0.00 | 0.00 | 0.00 |      | 97    | 20188 | 100  | 100   |
| $\psi_{97}$      | 0.0  | 0.00  |       | 0.01 | 0.01 | 0.01 |      | 98    | 32873 | 100  | 100   |
| $\psi_{98}$      | 0.0  | 0.00  |       | 0.01 | 0.01 | 0.01 |      | 95    | 32411 | 100  | 100   |
| $\mu_{1,i}$      |      | 0.00  | 0.05  | 0.22 | 0.34 | 0.24 | 0.60 | 92    | 21754 | 100  | 100   |
| $\mu_{2,i}$      |      | -0.00 | 0.29  | 0.21 | 0.36 | 0.23 | 0.66 | 93    | 27152 | 100  | 100   |
| $a_{1,i}$        |      | -0.00 | 0.02  | 0.06 | 0.19 | 0.06 | 0.99 | 94    | 34259 | 100  | 100   |
| $a_{2,i}$        |      | -0.00 | 0.03  | 0.06 | 0.20 | 0.06 | 0.98 | 94    | 32798 | 100  | 100   |
| $b_{1,i}$        |      | 0.00  | 0.06  | 0.06 | 0.22 | 0.07 | 0.56 | 94    | 33218 | 100  | 100   |
| $b_{2,i}$        |      | -0.00 | -0.38 | 0.06 | 0.21 | 0.07 | 0.55 | 94    | 34632 | 100  | 100   |
| $\sigma_{1,i}^2$ |      | 0.00  | 0.03  | 0.64 | 3.82 | 0.84 | 1.00 | 95    | 31134 | 100  | 100   |
| $\sigma_{2,i}^2$ |      | 0.01  | 0.03  | 0.65 | 3.76 | 0.85 | 1.00 | 95    | 31984 | 100  | 100   |
| $r_i$            |      | -0.00 | -0.18 | 0.09 | 0.30 | 0.10 | 0.76 | 95    | 24209 | 100  | 100   |

Table S6

*Simulation results for JAGS under the low stability condition ( $N = 100$  persons,  $T = 60$  time points)*

| Par                  | True | Bias  | RBias | SE   | MCSE | RMSE | SENS | CR(%) | ESS   | %ESS | %Rhat |
|----------------------|------|-------|-------|------|------|------|------|-------|-------|------|-------|
| $\mu_1$              | 0.5  | -0.01 | -0.02 | 0.05 | 0.05 | 0.05 | 1.00 | 97    | 809   | 50   | 100   |
| $\alpha_{\mu_1}$     | -0.3 | 0.01  | -0.02 | 0.06 | 0.06 | 0.06 | 1.00 | 93    | 498   | 6    | 100   |
| $\mu_2$              | 0.5  | 0.01  | 0.01  | 0.05 | 0.05 | 0.05 | 1.00 | 93    | 806   | 49   | 100   |
| $\alpha_{\mu_2}$     | 0.3  | 0.00  | 0.01  | 0.05 | 0.06 | 0.06 | 1.00 | 92    | 580   | 10   | 100   |
| $a_1$                | 0.3  | -0.01 | -0.04 | 0.02 | 0.02 | 0.02 | 1.00 | 92    | 1046  | 94   | 100   |
| $\alpha_{a_1}$       | -0.2 | -0.00 | 0.02  | 0.02 | 0.02 | 0.02 | 1.00 | 95    | 1407  | 98   | 100   |
| $a_2$                | 0.3  | -0.01 | -0.04 | 0.02 | 0.02 | 0.02 | 1.00 | 92    | 1040  | 96   | 100   |
| $\alpha_{a_2}$       | 0.2  | 0.01  | 0.04  | 0.02 | 0.01 | 0.02 | 1.00 | 98    | 1557  | 100  | 100   |
| $b_1$                | -0.1 | 0.02  | -0.22 | 0.02 | 0.02 | 0.03 | 0.96 | 80    | 2545  | 100  | 100   |
| $\alpha_{b_1}$       | -0.2 | -0.02 | 0.08  | 0.02 | 0.02 | 0.02 | 1.00 | 84    | 2513  | 100  | 100   |
| $b_2$                | -0.1 | 0.02  | -0.16 | 0.02 | 0.02 | 0.02 | 0.99 | 91    | 3036  | 100  | 100   |
| $\alpha_{b_2}$       | 0.2  | 0.01  | 0.03  | 0.02 | 0.02 | 0.02 | 1.00 | 94    | 3437  | 100  | 100   |
| $l\sigma_1$          | 0.5  | -0.00 | -0.01 | 0.03 | 0.04 | 0.04 | 1.00 | 90    | 21700 | 100  | 100   |
| $\alpha_{l\sigma_1}$ | -0.3 | 0.00  | -0.01 | 0.03 | 0.04 | 0.04 | 1.00 | 94    | 21450 | 100  | 100   |
| $l\sigma_2$          | 0.5  | -0.00 | -0.00 | 0.03 | 0.03 | 0.03 | 1.00 | 98    | 21949 | 100  | 100   |
| $\alpha_{l\sigma_2}$ | 0.3  | -0.00 | -0.01 | 0.03 | 0.03 | 0.03 | 1.00 | 99    | 21592 | 100  | 100   |
| $z$                  | 0.5  | 0.01  | 0.02  | 0.04 | 0.04 | 0.04 | 1.00 | 95    | 13857 | 100  | 100   |
| $\alpha_z$           | -0.3 | -0.00 | 0.01  | 0.04 | 0.04 | 0.04 | 1.00 | 96    | 12197 | 100  | 100   |
| $\psi_1$             | 0.3  | 0.01  | 0.04  | 0.04 | 0.04 | 0.04 | 1.00 | 95    | 805   | 45   | 100   |
| $\psi_2$             | 0.3  | 0.00  | 0.01  | 0.04 | 0.03 | 0.03 | 1.00 | 98    | 919   | 77   | 100   |
| $\psi_3$             | 0.1  | 0.02  | 0.16  | 0.02 | 0.01 | 0.02 | 1.00 | 90    | 825   | 61   | 100   |
| $\psi_4$             | 0.1  | 0.01  | 0.15  | 0.02 | 0.01 | 0.02 | 1.00 | 90    | 887   | 77   | 100   |
| $\psi_5$             | 0.1  | 0.00  | 0.03  | 0.02 | 0.02 | 0.02 | 1.00 | 94    | 2156  | 96   | 100   |
| $\psi_6$             | 0.1  | 0.00  | 0.05  | 0.02 | 0.02 | 0.02 | 1.00 | 91    | 2420  | 98   | 100   |
| $\psi_7$             | 0.3  | 0.00  | 0.01  | 0.03 | 0.03 | 0.03 | 1.00 | 95    | 11428 | 100  | 100   |
| $\psi_8$             | 0.3  | 0.00  | 0.01  | 0.03 | 0.02 | 0.02 | 1.00 | 98    | 11547 | 100  | 100   |
| $\psi_9$             | 0.3  | 0.01  | 0.02  | 0.03 | 0.03 | 0.03 | 1.00 | 95    | 5939  | 100  | 100   |
| $\psi_{21}$          | -0.0 | 0.01  | -0.26 | 0.02 | 0.02 | 0.02 | 0.47 | 93    | 737   | 31   | 100   |
| $\psi_{31}$          | 0.0  | -0.01 | -0.40 | 0.01 | 0.01 | 0.01 | 0.18 | 91    | 704   | 18   | 100   |
| $\psi_{42}$          | 0.0  | -0.01 | -0.35 | 0.01 | 0.01 | 0.01 | 0.29 | 89    | 823   | 49   | 100   |
| $\psi_{32}$          | 0.0  | 0.00  |       | 0.01 | 0.01 | 0.01 |      | 98    | 788   | 41   | 100   |
| $\psi_{41}$          | 0.0  | -0.00 |       | 0.01 | 0.01 | 0.01 |      | 100   | 732   | 27   | 100   |
| $\psi_{43}$          | 0.0  | 0.00  |       | 0.00 | 0.00 | 0.00 |      | 99    | 843   | 69   | 100   |
| $\mu_{1,i}$          |      | -0.01 | 1.57  | 0.23 | 0.37 | 0.23 | 0.60 | 95    | 1681  | 97   | 100   |
| $\mu_{2,i}$          |      | 0.00  | -0.20 | 0.21 | 0.37 | 0.22 | 0.65 | 95    | 1700  | 97   | 100   |
| $a_{1,i}$            |      | -0.01 | -0.06 | 0.09 | 0.22 | 0.09 | 0.70 | 96    | 1889  | 99   | 100   |
| $a_{2,i}$            |      | -0.01 | 0.01  | 0.09 | 0.22 | 0.08 | 0.71 | 96    | 1929  | 100  | 100   |
| $b_{1,i}$            |      | 0.02  | -0.52 | 0.08 | 0.22 | 0.09 | 0.47 | 93    | 10925 | 100  | 100   |
| $b_{2,i}$            |      | 0.02  | -0.24 | 0.08 | 0.22 | 0.09 | 0.45 | 94    | 10901 | 100  | 100   |
| $\sigma_{1,i}^2$     |      | 0.00  | 0.05  | 0.81 | 3.73 | 1.06 | 1.00 | 95    | 10448 | 100  | 100   |
| $\sigma_{2,i}^2$     |      | 0.00  | 0.04  | 0.82 | 3.67 | 1.06 | 1.00 | 95    | 10660 | 100  | 100   |
| $r_i$                |      | 0.01  | 0.34  | 0.12 | 0.29 | 0.13 | 0.69 | 95    | 13239 | 100  | 100   |

Table S7

*Simulation results for JAGS under the high stability condition ( $N = 100$  persons,  $T = 60$  time points)*

| Par                  | True | Bias  | RBias | SE   | MCSE | RMSE | SENS | CR(%) | ESS   | %ESS | %Rhat |
|----------------------|------|-------|-------|------|------|------|------|-------|-------|------|-------|
| $\mu_1$              | 0.5  | -0.03 | -0.06 | 0.07 | 0.08 | 0.08 | 1.00 | 92    | 288   | 0    | 99    |
| $\alpha_{\mu_1}$     | -0.3 | 0.03  | -0.08 | 0.08 | 0.09 | 0.09 | 0.94 | 96    | 162   | 0    | 99    |
| $\mu_2$              | 0.5  | -0.02 | -0.04 | 0.06 | 0.06 | 0.06 | 1.00 | 93    | 408   | 1    | 100   |
| $\alpha_{\mu_2}$     | 0.3  | -0.01 | -0.02 | 0.07 | 0.07 | 0.07 | 0.97 | 94    | 217   | 0    | 99    |
| $a_1$                | 0.6  | -0.02 | -0.04 | 0.02 | 0.01 | 0.03 | 1.00 | 70    | 1646  | 100  | 100   |
| $\alpha_{a_1}$       | -0.2 | 0.02  | -0.12 | 0.01 | 0.02 | 0.03 | 1.00 | 66    | 1897  | 100  | 100   |
| $a_2$                | 0.5  | -0.01 | -0.03 | 0.02 | 0.01 | 0.02 | 1.00 | 94    | 1404  | 100  | 100   |
| $\alpha_{a_2}$       | 0.2  | -0.01 | -0.06 | 0.02 | 0.01 | 0.02 | 1.00 | 85    | 1919  | 100  | 100   |
| $b_1$                | -0.1 | 0.03  | -0.30 | 0.02 | 0.02 | 0.04 | 0.96 | 59    | 2935  | 100  | 100   |
| $\alpha_{b_1}$       | -0.2 | -0.02 | 0.10  | 0.02 | 0.02 | 0.03 | 1.00 | 82    | 2530  | 100  | 100   |
| $b_2$                | -0.1 | 0.02  | -0.17 | 0.02 | 0.01 | 0.02 | 1.00 | 84    | 3946  | 100  | 100   |
| $\alpha_{b_2}$       | 0.2  | 0.00  | 0.01  | 0.02 | 0.02 | 0.02 | 1.00 | 94    | 3776  | 100  | 100   |
| $l\sigma_1$          | 0.5  | 0.00  | 0.00  | 0.03 | 0.04 | 0.04 | 1.00 | 94    | 22063 | 100  | 100   |
| $\alpha_{l\sigma_1}$ | -0.3 | 0.00  | -0.01 | 0.03 | 0.03 | 0.03 | 1.00 | 95    | 21288 | 100  | 100   |
| $l\sigma_2$          | 0.5  | -0.00 | -0.01 | 0.03 | 0.03 | 0.03 | 1.00 | 97    | 21824 | 100  | 100   |
| $\alpha_{l\sigma_2}$ | 0.3  | -0.00 | -0.01 | 0.03 | 0.03 | 0.03 | 1.00 | 98    | 21846 | 100  | 100   |
| $z$                  | 0.5  | 0.00  | 0.01  | 0.04 | 0.04 | 0.04 | 1.00 | 95    | 13054 | 100  | 100   |
| $\alpha_z$           | -0.3 | -0.00 | 0.01  | 0.04 | 0.04 | 0.04 | 1.00 | 96    | 12143 | 100  | 100   |
| $\psi_1$             | 0.3  | 0.01  | 0.02  | 0.06 | 0.04 | 0.04 | 1.00 | 99    | 337   | 0    | 100   |
| $\psi_2$             | 0.3  | 0.00  | 0.00  | 0.05 | 0.04 | 0.04 | 1.00 | 99    | 453   | 0    | 100   |
| $\psi_3$             | 0.1  | 0.01  | 0.09  | 0.01 | 0.01 | 0.01 | 1.00 | 93    | 1237  | 100  | 100   |
| $\psi_4$             | 0.1  | 0.01  | 0.12  | 0.01 | 0.01 | 0.02 | 1.00 | 93    | 1160  | 99   | 100   |
| $\psi_5$             | 0.1  | 0.00  | 0.04  | 0.02 | 0.02 | 0.02 | 1.00 | 93    | 2496  | 99   | 100   |
| $\psi_6$             | 0.1  | 0.00  | 0.03  | 0.01 | 0.02 | 0.02 | 1.00 | 95    | 2973  | 100  | 100   |
| $\psi_7$             | 0.3  | 0.00  | 0.01  | 0.03 | 0.02 | 0.02 | 1.00 | 97    | 11589 | 100  | 100   |
| $\psi_8$             | 0.3  | -0.00 | -0.00 | 0.02 | 0.02 | 0.02 | 1.00 | 98    | 11570 | 100  | 100   |
| $\psi_9$             | 0.3  | 0.01  | 0.02  | 0.03 | 0.03 | 0.03 | 1.00 | 94    | 5388  | 100  | 100   |
| $\psi_{21}$          | -0.0 | 0.02  | -0.38 | 0.03 | 0.02 | 0.03 | 0.10 | 95    | 309   | 0    | 100   |
| $\psi_{31}$          | 0.0  | -0.01 | -0.55 | 0.01 | 0.01 | 0.01 | 0.04 | 86    | 526   | 0    | 100   |
| $\psi_{42}$          | 0.0  | -0.01 | -0.34 | 0.01 | 0.01 | 0.01 | 0.26 | 89    | 644   | 8    | 100   |
| $\psi_{32}$          | 0.0  | 0.00  |       | 0.01 | 0.01 | 0.01 |      | 98    | 647   | 8    | 100   |
| $\psi_{41}$          | 0.0  | 0.00  |       | 0.01 | 0.00 | 0.00 |      | 100   | 501   | 0    | 100   |
| $\psi_{43}$          | 0.0  | 0.00  |       | 0.00 | 0.00 | 0.00 |      | 98    | 1173  | 100  | 100   |
| $\mu_{1,i}$          |      | -0.01 | -2.91 | 0.27 | 0.34 | 0.28 | 0.45 | 94    | 1238  | 82   | 100   |
| $\mu_{2,i}$          |      | -0.01 | 0.08  | 0.25 | 0.35 | 0.25 | 0.55 | 94    | 1324  | 87   | 100   |
| $a_{1,i}$            |      | -0.01 | 0.02  | 0.08 | 0.19 | 0.08 | 0.99 | 95    | 2128  | 99   | 100   |
| $a_{2,i}$            |      | -0.01 | -2.62 | 0.08 | 0.20 | 0.08 | 0.96 | 96    | 2071  | 100  | 100   |
| $b_{1,i}$            |      | 0.03  | -0.51 | 0.08 | 0.23 | 0.09 | 0.51 | 93    | 10581 | 100  | 100   |
| $b_{2,i}$            |      | 0.02  | 0.10  | 0.07 | 0.21 | 0.08 | 0.49 | 95    | 10941 | 100  | 100   |
| $\sigma_{1,i}^2$     |      | -0.01 | 0.05  | 0.82 | 3.79 | 1.07 | 1.00 | 95    | 10453 | 100  | 100   |
| $\sigma_{2,i}^2$     |      | -0.01 | 0.05  | 0.82 | 3.60 | 1.09 | 1.00 | 95    | 10637 | 100  | 100   |
| $r_i$                |      | 0.00  | -0.27 | 0.13 | 0.29 | 0.13 | 0.67 | 95    | 12765 | 100  | 100   |

Table S8

*Simulation results for JAGS under the low stability condition ( $N = 60$  persons,  $T = 100$  time points)*

| Par                  | True | Bias  | RBias | SE   | MCSE | RMSE | SENS | CR(%) | ESS   | %ESS | %Rhat |
|----------------------|------|-------|-------|------|------|------|------|-------|-------|------|-------|
| $\mu_1$              | 0.5  | -0.00 | -0.00 | 0.06 | 0.06 | 0.06 | 1.00 | 94    | 1062  | 84   | 100   |
| $\alpha_{\mu_1}$     | -0.3 | -0.00 | 0.01  | 0.06 | 0.06 | 0.06 | 0.99 | 98    | 579   | 12   | 100   |
| $\mu_2$              | 0.5  | -0.02 | -0.03 | 0.06 | 0.06 | 0.06 | 1.00 | 91    | 1141  | 86   | 100   |
| $\alpha_{\mu_2}$     | 0.3  | -0.00 | -0.00 | 0.06 | 0.06 | 0.06 | 1.00 | 97    | 719   | 30   | 100   |
| $a_1$                | 0.3  | -0.01 | -0.03 | 0.02 | 0.02 | 0.02 | 1.00 | 94    | 1691  | 100  | 100   |
| $\alpha_{a_1}$       | -0.2 | -0.00 | 0.01  | 0.02 | 0.02 | 0.02 | 1.00 | 95    | 2209  | 100  | 100   |
| $a_2$                | 0.3  | -0.01 | -0.05 | 0.02 | 0.02 | 0.03 | 1.00 | 90    | 1672  | 100  | 100   |
| $\alpha_{a_2}$       | 0.2  | 0.01  | 0.03  | 0.02 | 0.02 | 0.02 | 1.00 | 96    | 2430  | 100  | 100   |
| $b_1$                | -0.1 | 0.03  | -0.26 | 0.02 | 0.02 | 0.03 | 0.93 | 75    | 3567  | 100  | 100   |
| $\alpha_{b_1}$       | -0.2 | -0.01 | 0.07  | 0.02 | 0.02 | 0.03 | 1.00 | 87    | 3441  | 98   | 100   |
| $b_2$                | -0.1 | 0.02  | -0.19 | 0.02 | 0.02 | 0.03 | 0.97 | 90    | 4105  | 99   | 100   |
| $\alpha_{b_2}$       | 0.2  | 0.01  | 0.05  | 0.02 | 0.02 | 0.02 | 1.00 | 93    | 4415  | 99   | 100   |
| $l\sigma_1$          | 0.5  | -0.00 | -0.00 | 0.04 | 0.04 | 0.04 | 1.00 | 94    | 27088 | 100  | 100   |
| $\alpha_{l\sigma_1}$ | -0.3 | -0.01 | 0.02  | 0.04 | 0.04 | 0.04 | 1.00 | 96    | 26129 | 100  | 100   |
| $l\sigma_2$          | 0.5  | -0.00 | -0.00 | 0.04 | 0.04 | 0.04 | 1.00 | 97    | 27445 | 100  | 100   |
| $\alpha_{l\sigma_2}$ | 0.3  | -0.01 | -0.02 | 0.04 | 0.04 | 0.04 | 1.00 | 97    | 27206 | 100  | 100   |
| $z$                  | 0.5  | -0.00 | -0.01 | 0.04 | 0.04 | 0.04 | 1.00 | 96    | 19410 | 100  | 100   |
| $\alpha_z$           | -0.3 | 0.00  | -0.01 | 0.05 | 0.04 | 0.04 | 1.00 | 97    | 17708 | 100  | 100   |
| $\psi_1$             | 0.3  | 0.01  | 0.03  | 0.04 | 0.04 | 0.04 | 1.00 | 99    | 1183  | 94   | 100   |
| $\psi_2$             | 0.3  | 0.00  | 0.01  | 0.04 | 0.03 | 0.03 | 1.00 | 98    | 1324  | 99   | 100   |
| $\psi_3$             | 0.1  | 0.02  | 0.17  | 0.02 | 0.01 | 0.02 | 1.00 | 88    | 1481  | 100  | 100   |
| $\psi_4$             | 0.1  | 0.02  | 0.16  | 0.02 | 0.01 | 0.02 | 1.00 | 92    | 1588  | 100  | 100   |
| $\psi_5$             | 0.1  | 0.00  | 0.05  | 0.02 | 0.02 | 0.02 | 1.00 | 90    | 2955  | 98   | 100   |
| $\psi_6$             | 0.1  | 0.00  | 0.04  | 0.02 | 0.02 | 0.02 | 1.00 | 95    | 3080  | 95   | 100   |
| $\psi_7$             | 0.3  | 0.00  | 0.01  | 0.03 | 0.03 | 0.03 | 1.00 | 95    | 14035 | 100  | 100   |
| $\psi_8$             | 0.3  | 0.01  | 0.02  | 0.03 | 0.03 | 0.03 | 1.00 | 96    | 14315 | 100  | 100   |
| $\psi_9$             | 0.3  | 0.01  | 0.02  | 0.04 | 0.03 | 0.03 | 1.00 | 98    | 8692  | 100  | 100   |
| $\psi_{21}$          | -0.0 | 0.01  | -0.28 | 0.02 | 0.02 | 0.02 | 0.39 | 89    | 1095  | 91   | 100   |
| $\psi_{31}$          | 0.0  | -0.01 | -0.34 | 0.01 | 0.01 | 0.01 | 0.21 | 92    | 1147  | 94   | 100   |
| $\psi_{42}$          | 0.0  | -0.00 | -0.30 | 0.01 | 0.01 | 0.01 | 0.25 | 99    | 1287  | 100  | 100   |
| $\psi_{32}$          | 0.0  | 0.00  |       | 0.01 | 0.01 | 0.01 |      | 98    | 1272  | 100  | 100   |
| $\psi_{41}$          | 0.0  | -0.00 |       | 0.01 | 0.01 | 0.01 |      | 95    | 1172  | 99   | 100   |
| $\psi_{43}$          | 0.0  | 0.00  |       | 0.00 | 0.00 | 0.00 |      | 99    | 1479  | 100  | 100   |
| $\mu_{1,i}$          |      | -0.00 | 0.77  | 0.20 | 0.38 | 0.21 | 0.67 | 95    | 1503  | 93   | 100   |
| $\mu_{2,i}$          |      | -0.01 | 1.77  | 0.19 | 0.38 | 0.20 | 0.69 | 95    | 1534  | 94   | 100   |
| $a_{1,i}$            |      | -0.01 | 0.58  | 0.08 | 0.22 | 0.08 | 0.74 | 96    | 1861  | 99   | 100   |
| $a_{2,i}$            |      | -0.01 | 0.32  | 0.08 | 0.22 | 0.08 | 0.74 | 96    | 1914  | 100  | 100   |
| $b_{1,i}$            |      | 0.02  | -0.76 | 0.08 | 0.23 | 0.08 | 0.50 | 94    | 9610  | 100  | 100   |
| $b_{2,i}$            |      | 0.02  | -0.42 | 0.07 | 0.22 | 0.08 | 0.48 | 94    | 9519  | 99   | 100   |
| $\sigma_{1,i}^2$     |      | 0.02  | 0.03  | 0.64 | 3.75 | 0.84 | 1.00 | 95    | 10426 | 100  | 100   |
| $\sigma_{2,i}^2$     |      | 0.01  | 0.03  | 0.65 | 3.73 | 0.86 | 1.00 | 95    | 10607 | 100  | 100   |
| $r_i$                |      | 0.00  | 0.25  | 0.10 | 0.30 | 0.10 | 0.74 | 95    | 13350 | 100  | 100   |



Table S9

*Simulation results for JAGS under the high stability condition ( $N = 60$  persons,  $T = 100$  time points)*

| Par                  | True | Bias  | RBias | SE   | MCSE | RMSE | SENS | CR(%) | ESS   | %ESS | %Rhat |
|----------------------|------|-------|-------|------|------|------|------|-------|-------|------|-------|
| $\mu_1$              | 0.5  | -0.03 | -0.05 | 0.08 | 0.08 | 0.09 | 1.00 | 94    | 404   | 0    | 100   |
| $\alpha_{\mu_1}$     | -0.3 | 0.02  | -0.08 | 0.09 | 0.09 | 0.10 | 0.84 | 88    | 226   | 0    | 99    |
| $\mu_2$              | 0.5  | -0.01 | -0.02 | 0.07 | 0.07 | 0.07 | 1.00 | 88    | 607   | 12   | 100   |
| $\alpha_{\mu_2}$     | 0.3  | -0.00 | -0.02 | 0.08 | 0.08 | 0.08 | 0.94 | 95    | 308   | 0    | 99    |
| $a_1$                | 0.6  | -0.02 | -0.04 | 0.02 | 0.02 | 0.03 | 1.00 | 80    | 2698  | 100  | 100   |
| $\alpha_{a_1}$       | -0.2 | 0.03  | -0.13 | 0.02 | 0.02 | 0.03 | 1.00 | 69    | 2950  | 100  | 100   |
| $a_2$                | 0.5  | -0.01 | -0.03 | 0.02 | 0.02 | 0.02 | 1.00 | 91    | 2290  | 100  | 100   |
| $\alpha_{a_2}$       | 0.2  | -0.01 | -0.07 | 0.02 | 0.02 | 0.02 | 1.00 | 90    | 2866  | 100  | 100   |
| $b_1$                | -0.1 | 0.03  | -0.30 | 0.02 | 0.02 | 0.03 | 0.96 | 69    | 4172  | 100  | 100   |
| $\alpha_{b_1}$       | -0.2 | -0.02 | 0.09  | 0.02 | 0.02 | 0.02 | 1.00 | 91    | 3571  | 100  | 100   |
| $b_2$                | -0.1 | 0.01  | -0.14 | 0.02 | 0.02 | 0.02 | 0.99 | 86    | 5467  | 100  | 100   |
| $\alpha_{b_2}$       | 0.2  | 0.01  | 0.03  | 0.02 | 0.02 | 0.02 | 1.00 | 94    | 5036  | 100  | 100   |
| $l\sigma_1$          | 0.5  | 0.00  | 0.00  | 0.04 | 0.05 | 0.05 | 1.00 | 93    | 27268 | 100  | 100   |
| $\alpha_{l\sigma_1}$ | -0.3 | -0.00 | 0.01  | 0.04 | 0.04 | 0.04 | 1.00 | 93    | 26805 | 100  | 100   |
| $l\sigma_2$          | 0.5  | -0.00 | -0.00 | 0.04 | 0.04 | 0.04 | 1.00 | 99    | 27689 | 100  | 100   |
| $\alpha_{l\sigma_2}$ | 0.3  | -0.01 | -0.03 | 0.04 | 0.04 | 0.04 | 1.00 | 99    | 27642 | 100  | 100   |
| $z$                  | 0.5  | 0.00  | 0.00  | 0.05 | 0.04 | 0.04 | 1.00 | 96    | 18485 | 100  | 100   |
| $\alpha_z$           | -0.3 | 0.01  | -0.04 | 0.05 | 0.04 | 0.04 | 1.00 | 99    | 17780 | 100  | 100   |
| $\psi_1$             | 0.3  | 0.01  | 0.05  | 0.06 | 0.04 | 0.04 | 1.00 | 97    | 528   | 2    | 100   |
| $\psi_2$             | 0.3  | 0.01  | 0.02  | 0.05 | 0.04 | 0.04 | 1.00 | 98    | 695   | 26   | 100   |
| $\psi_3$             | 0.1  | 0.01  | 0.11  | 0.01 | 0.01 | 0.01 | 1.00 | 97    | 2214  | 100  | 100   |
| $\psi_4$             | 0.1  | 0.01  | 0.13  | 0.01 | 0.01 | 0.02 | 1.00 | 93    | 1995  | 100  | 100   |
| $\psi_5$             | 0.1  | 0.00  | 0.03  | 0.02 | 0.02 | 0.02 | 1.00 | 89    | 3241  | 97   | 100   |
| $\psi_6$             | 0.1  | 0.00  | 0.02  | 0.02 | 0.02 | 0.02 | 1.00 | 96    | 3856  | 100  | 100   |
| $\psi_7$             | 0.3  | 0.00  | 0.01  | 0.03 | 0.03 | 0.03 | 1.00 | 97    | 14123 | 100  | 100   |
| $\psi_8$             | 0.3  | 0.01  | 0.03  | 0.03 | 0.03 | 0.03 | 1.00 | 95    | 14336 | 100  | 100   |
| $\psi_9$             | 0.3  | 0.01  | 0.04  | 0.04 | 0.04 | 0.04 | 1.00 | 92    | 8347  | 100  | 100   |
| $\psi_{21}$          | -0.0 | 0.01  | -0.30 | 0.03 | 0.02 | 0.03 | 0.18 | 97    | 516   | 1    | 100   |
| $\psi_{31}$          | 0.0  | -0.01 | -0.41 | 0.01 | 0.01 | 0.01 | 0.12 | 92    | 845   | 52   | 100   |
| $\psi_{42}$          | 0.0  | -0.00 | -0.33 | 0.01 | 0.01 | 0.01 | 0.21 | 97    | 997   | 89   | 100   |
| $\psi_{32}$          | 0.0  | 0.00  |       | 0.01 | 0.01 | 0.01 |      | 99    | 1047  | 88   | 100   |
| $\psi_{41}$          | 0.0  | 0.00  |       | 0.01 | 0.01 | 0.01 |      | 100   | 816   | 53   | 100   |
| $\psi_{43}$          | 0.0  | 0.00  |       | 0.00 | 0.00 | 0.00 |      | 100   | 2087  | 100  | 100   |
| $\mu_{1,i}$          |      | -0.00 | 0.13  | 0.26 | 0.36 | 0.26 | 0.50 | 94    | 1154  | 79   | 100   |
| $\mu_{2,i}$          |      | -0.00 | -0.18 | 0.23 | 0.37 | 0.24 | 0.61 | 94    | 1214  | 83   | 100   |
| $a_{1,i}$            |      | -0.01 | 0.01  | 0.07 | 0.19 | 0.07 | 0.99 | 95    | 2140  | 99   | 100   |
| $a_{2,i}$            |      | -0.01 | 0.02  | 0.07 | 0.20 | 0.07 | 0.97 | 96    | 2066  | 100  | 100   |
| $b_{1,i}$            |      | 0.03  | -0.05 | 0.07 | 0.23 | 0.08 | 0.55 | 92    | 9052  | 100  | 100   |
| $b_{2,i}$            |      | 0.01  | -0.33 | 0.07 | 0.22 | 0.07 | 0.53 | 94    | 9504  | 100  | 100   |
| $\sigma_{1,i}^2$     |      | -0.01 | 0.03  | 0.64 | 3.71 | 0.79 | 1.00 | 95    | 10354 | 100  | 100   |
| $\sigma_{2,i}^2$     |      | -0.01 | 0.02  | 0.65 | 3.64 | 0.84 | 1.00 | 95    | 10515 | 100  | 100   |
| $r_i$                |      | 0.00  | 0.81  | 0.10 | 0.29 | 0.11 | 0.74 | 95    | 12623 | 100  | 100   |

Table S10

*Simulation results for JAGS under the high stability condition ( $N = 200$  persons,  $T = 100$  time points)*

| Par                  | True | Bias  | RBias | SE   | MCSE | RMSE | SENS | CR(%) | ESS   | %ESS | %Rhat |
|----------------------|------|-------|-------|------|------|------|------|-------|-------|------|-------|
| $\mu_1$              | 0.5  | -0.03 | -0.05 | 0.04 | 0.04 | 0.05 | 1.00 | 91    | 363   | 0    | 100   |
| $\alpha_{\mu_1}$     | -0.3 | 0.02  | -0.05 | 0.05 | 0.04 | 0.05 | 1.00 | 92    | 205   | 0    | 99    |
| $\mu_2$              | 0.5  | -0.01 | -0.03 | 0.04 | 0.04 | 0.04 | 1.00 | 91    | 553   | 3    | 100   |
| $\alpha_{\mu_2}$     | 0.3  | 0.00  | 0.00  | 0.04 | 0.04 | 0.04 | 1.00 | 95    | 289   | 0    | 99    |
| $a_1$                | 0.6  | -0.02 | -0.04 | 0.01 | 0.01 | 0.02 | 1.00 | 40    | 2413  | 100  | 100   |
| $\alpha_{a_1}$       | -0.2 | 0.02  | -0.12 | 0.01 | 0.01 | 0.02 | 1.00 | 26    | 2652  | 100  | 100   |
| $a_2$                | 0.5  | -0.01 | -0.03 | 0.01 | 0.01 | 0.02 | 1.00 | 75    | 2079  | 100  | 100   |
| $\alpha_{a_2}$       | 0.2  | -0.01 | -0.06 | 0.01 | 0.01 | 0.02 | 1.00 | 73    | 2646  | 100  | 100   |
| $b_1$                | -0.1 | 0.03  | -0.29 | 0.01 | 0.01 | 0.03 | 1.00 | 24    | 4123  | 100  | 100   |
| $\alpha_{b_1}$       | -0.2 | -0.02 | 0.09  | 0.01 | 0.01 | 0.02 | 1.00 | 60    | 3448  | 100  | 100   |
| $b_2$                | -0.1 | 0.02  | -0.18 | 0.01 | 0.01 | 0.02 | 1.00 | 58    | 5632  | 100  | 100   |
| $\alpha_{b_2}$       | 0.2  | 0.00  | 0.02  | 0.01 | 0.01 | 0.01 | 1.00 | 98    | 5147  | 100  | 100   |
| $l\sigma_1$          | 0.5  | -0.00 | -0.00 | 0.02 | 0.03 | 0.03 | 1.00 | 91    | 27658 | 100  | 100   |
| $\alpha_{l\sigma_1}$ | -0.3 | -0.00 | 0.00  | 0.02 | 0.02 | 0.02 | 1.00 | 93    | 26965 | 100  | 100   |
| $l\sigma_2$          | 0.5  | -0.00 | -0.00 | 0.02 | 0.02 | 0.02 | 1.00 | 95    | 27715 | 100  | 100   |
| $\alpha_{l\sigma_2}$ | 0.3  | 0.00  | 0.01  | 0.02 | 0.02 | 0.02 | 1.00 | 96    | 27277 | 100  | 100   |
| $z$                  | 0.5  | 0.00  | 0.01  | 0.02 | 0.02 | 0.02 | 1.00 | 97    | 18369 | 100  | 100   |
| $\alpha_z$           | -0.3 | 0.00  | -0.00 | 0.02 | 0.02 | 0.02 | 1.00 | 95    | 17562 | 100  | 100   |
| $\psi_1$             | 0.3  | 0.01  | 0.03  | 0.04 | 0.04 | 0.04 | 1.00 | 97    | 350   | 0    | 100   |
| $\psi_2$             | 0.3  | 0.00  | 0.01  | 0.03 | 0.03 | 0.03 | 1.00 | 98    | 531   | 1    | 100   |
| $\psi_3$             | 0.1  | 0.00  | 0.02  | 0.01 | 0.01 | 0.01 | 1.00 | 96    | 1557  | 100  | 100   |
| $\psi_4$             | 0.1  | 0.00  | 0.05  | 0.01 | 0.01 | 0.01 | 1.00 | 96    | 1456  | 100  | 100   |
| $\psi_5$             | 0.1  | 0.00  | 0.03  | 0.01 | 0.01 | 0.01 | 1.00 | 95    | 3542  | 100  | 100   |
| $\psi_6$             | 0.1  | 0.00  | 0.04  | 0.01 | 0.01 | 0.01 | 1.00 | 96    | 4242  | 100  | 100   |
| $\psi_7$             | 0.3  | 0.00  | 0.00  | 0.02 | 0.02 | 0.02 | 1.00 | 95    | 15053 | 100  | 100   |
| $\psi_8$             | 0.3  | -0.00 | -0.00 | 0.02 | 0.01 | 0.01 | 1.00 | 99    | 15215 | 100  | 100   |
| $\psi_9$             | 0.3  | 0.00  | 0.00  | 0.02 | 0.02 | 0.02 | 1.00 | 92    | 8519  | 100  | 100   |
| $\psi_{21}$          | -0.0 | 0.00  | -0.09 | 0.02 | 0.02 | 0.02 | 0.75 | 96    | 346   | 0    | 100   |
| $\psi_{31}$          | 0.0  | -0.00 | -0.26 | 0.00 | 0.00 | 0.01 | 0.69 | 90    | 553   | 4    | 100   |
| $\psi_{42}$          | 0.0  | -0.00 | -0.19 | 0.00 | 0.00 | 0.00 | 0.90 | 96    | 728   | 25   | 100   |
| $\psi_{32}$          | 0.0  | -0.00 |       | 0.00 | 0.00 | 0.00 |      | 96    | 719   | 21   | 100   |
| $\psi_{41}$          | 0.0  | 0.00  |       | 0.00 | 0.00 | 0.00 |      | 98    | 537   | 0    | 100   |
| $\psi_{43}$          | 0.0  | 0.00  |       | 0.00 | 0.00 | 0.00 |      | 90    | 1507  | 100  | 100   |
| $\mu_{1,i}$          |      | -0.00 | -0.08 | 0.24 | 0.35 | 0.24 | 0.55 | 95    | 1335  | 88   | 100   |
| $\mu_{2,i}$          |      | -0.00 | 0.34  | 0.22 | 0.37 | 0.22 | 0.63 | 95    | 1377  | 91   | 100   |
| $a_{1,i}$            |      | -0.01 | 0.01  | 0.06 | 0.19 | 0.07 | 0.99 | 94    | 2297  | 99   | 100   |
| $a_{2,i}$            |      | -0.01 | 0.03  | 0.07 | 0.20 | 0.07 | 0.97 | 95    | 2229  | 100  | 100   |
| $b_{1,i}$            |      | 0.03  | 0.23  | 0.07 | 0.23 | 0.08 | 0.55 | 92    | 11363 | 100  | 100   |
| $b_{2,i}$            |      | 0.02  | -0.44 | 0.06 | 0.22 | 0.07 | 0.53 | 94    | 11505 | 100  | 100   |
| $\sigma_{1,i}^2$     |      | -0.01 | 0.03  | 0.64 | 3.77 | 0.84 | 1.00 | 95    | 10563 | 100  | 100   |
| $\sigma_{2,i}^2$     |      | -0.00 | 0.03  | 0.64 | 3.75 | 0.85 | 1.00 | 95    | 10762 | 100  | 100   |
| $r_i$                |      | 0.00  | -0.10 | 0.10 | 0.30 | 0.11 | 0.74 | 95    | 13148 | 100  | 100   |

Table S11

*Simulation results for Mplus under the low stability condition ( $N = 100$  persons,  $T = 60$  time points)*

| Par                  | True | Bias  | RBias | SE   | MCSE | RMSE | SENS | CR(%) | ESS  | %ESS | %Rhat |
|----------------------|------|-------|-------|------|------|------|------|-------|------|------|-------|
| $\mu_1$              | 0.5  | -0.00 | -0.01 | 0.05 | 0.05 | 0.05 | 1.00 | 97    | 1094 | 95   | 100   |
| $\alpha_{\mu_1}$     | -0.3 | 0.01  | -0.04 | 0.08 | 0.08 | 0.08 | 0.94 | 94    | 1015 | 88   | 100   |
| $\mu_2$              | 0.5  | -0.00 | -0.00 | 0.05 | 0.05 | 0.05 | 1.00 | 95    | 1121 | 100  | 100   |
| $\alpha_{\mu_2}$     | 0.3  | -0.00 | -0.01 | 0.08 | 0.08 | 0.08 | 0.98 | 93    | 1135 | 95   | 100   |
| $a_1$                | 0.3  | -0.00 | -0.01 | 0.02 | 0.02 | 0.02 | 1.00 | 98    | 960  | 87   | 100   |
| $\alpha_{a_1}$       | -0.2 | -0.00 | 0.01  | 0.03 | 0.03 | 0.03 | 1.00 | 95    | 720  | 19   | 100   |
| $a_2$                | 0.3  | 0.00  | 0.00  | 0.02 | 0.02 | 0.02 | 1.00 | 97    | 910  | 78   | 100   |
| $\alpha_{a_2}$       | 0.2  | 0.00  | 0.02  | 0.03 | 0.03 | 0.03 | 1.00 | 96    | 698  | 20   | 100   |
| $b_1$                | -0.1 | 0.00  | -0.00 | 0.02 | 0.02 | 0.02 | 1.00 | 91    | 651  | 6    | 100   |
| $\alpha_{b_1}$       | -0.2 | -0.01 | 0.03  | 0.03 | 0.03 | 0.03 | 1.00 | 96    | 792  | 44   | 100   |
| $b_2$                | -0.1 | -0.00 | 0.00  | 0.02 | 0.02 | 0.02 | 1.00 | 98    | 656  | 6    | 100   |
| $\alpha_{b_2}$       | 0.2  | -0.00 | -0.01 | 0.03 | 0.03 | 0.03 | 1.00 | 96    | 790  | 40   | 100   |
| $l\sigma_1$          | 0.5  | 0.01  | 0.01  | 0.01 | 0.04 | 0.04 | 1.00 | 48    |      |      |       |
| $\alpha_{l\sigma_1}$ | -0.3 | 0.04  | -0.12 | 0.01 | 0.03 | 0.05 | 1.00 | 25    |      |      |       |
| $l\sigma_2$          | 0.5  | 0.01  | 0.01  | 0.01 | 0.03 | 0.03 | 1.00 | 53    |      |      |       |
| $\alpha_{l\sigma_2}$ | 0.3  | -0.03 | -0.09 | 0.01 | 0.03 | 0.04 | 1.00 | 32    |      |      |       |
| $z$                  | 0.5  | -0.02 | -0.04 | 0.02 | 0.04 | 0.04 | 1.00 | 60    |      |      |       |
| $\alpha_z$           | -0.3 | 0.07  | -0.23 | 0.02 | 0.04 | 0.08 | 1.00 | 23    |      |      |       |
| $\psi_1$             | 0.3  | 0.01  | 0.05  | 0.05 | 0.04 | 0.04 | 1.00 | 98    | 1159 | 92   | 100   |
| $\psi_2$             | 0.3  | 0.00  | 0.01  | 0.04 | 0.03 | 0.03 | 1.00 | 98    | 1522 | 100  | 100   |
| $\psi_3$             | 0.1  | 0.01  | 0.14  | 0.02 | 0.01 | 0.02 | 1.00 | 95    | 802  | 46   | 100   |
| $\psi_4$             | 0.1  | 0.01  | 0.13  | 0.02 | 0.01 | 0.02 | 1.00 | 95    | 851  | 65   | 100   |
| $\psi_5$             | 0.1  | 0.02  | 0.16  | 0.02 | 0.01 | 0.02 | 1.00 | 92    | 941  | 69   | 100   |
| $\psi_6$             | 0.1  | 0.01  | 0.13  | 0.02 | 0.01 | 0.02 | 1.00 | 94    | 1167 | 94   | 100   |
| $\psi_7$             | 0.3  | 0.00  | 0.00  | 0.01 | 0.02 | 0.02 | 1.00 | 61    |      |      |       |
| $\psi_8$             | 0.3  | -0.00 | -0.01 | 0.01 | 0.02 | 0.02 | 1.00 | 68    |      |      |       |
| $\psi_9$             | 0.3  | 0.04  | 0.12  | 0.02 | 0.03 | 0.04 | 1.00 | 45    |      |      |       |
| $\psi_{21}$          | -0.0 | 0.01  | -0.27 | 0.02 | 0.02 | 0.02 | 0.43 | 95    | 1169 | 97   | 100   |
| $\psi_{31}$          | 0.0  | -0.01 | -0.42 | 0.01 | 0.01 | 0.01 | 0.12 | 92    | 873  | 67   | 100   |
| $\psi_{42}$          | 0.0  | -0.01 | -0.42 | 0.01 | 0.01 | 0.01 | 0.17 | 88    | 1008 | 86   | 100   |
| $\psi_{32}$          | 0.0  | -0.00 |       | 0.01 | 0.01 | 0.01 |      | 98    | 926  | 83   | 100   |
| $\psi_{41}$          | 0.0  | -0.00 |       | 0.01 | 0.01 | 0.01 |      | 100   | 848  | 62   | 100   |
| $\psi_{43}$          | 0.0  | 0.00  |       | 0.00 | 0.00 | 0.00 |      | 100   | 847  | 63   | 100   |
| $\psi_{51}$          | 0.0  | -0.00 |       | 0.01 | 0.01 | 0.01 |      | 100   | 977  | 78   | 100   |
| $\psi_{52}$          | 0.0  | -0.00 |       | 0.01 | 0.01 | 0.01 |      | 100   | 896  | 74   | 100   |
| $\psi_{53}$          | 0.0  | -0.00 |       | 0.00 | 0.00 | 0.00 |      | 100   | 857  | 66   | 100   |
| $\psi_{54}$          | 0.0  | 0.00  |       | 0.00 | 0.00 | 0.00 |      | 100   | 840  | 59   | 100   |
| $\psi_{61}$          | 0.0  | -0.00 |       | 0.01 | 0.01 | 0.01 |      | 98    | 886  | 72   | 100   |
| $\psi_{62}$          | 0.0  | 0.00  |       | 0.01 | 0.01 | 0.01 |      | 97    | 1167 | 99   | 100   |
| $\psi_{63}$          | 0.0  | 0.00  |       | 0.00 | 0.00 | 0.00 |      | 99    | 880  | 66   | 100   |
| $\psi_{64}$          | 0.0  | -0.00 |       | 0.00 | 0.00 | 0.00 |      | 100   | 967  | 82   | 100   |
| $\psi_{65}$          | 0.0  | -0.00 |       | 0.00 | 0.00 | 0.00 |      | 99    | 847  | 56   | 100   |
| $\psi_{71}$          | 0.0  | 0.00  |       | 0.01 | 0.01 | 0.01 |      | 85    |      |      |       |
| $\psi_{72}$          | 0.0  | -0.00 |       | 0.01 | 0.01 | 0.01 |      | 88    |      |      |       |
| $\psi_{73}$          | 0.0  | 0.00  |       | 0.00 | 0.01 | 0.01 |      | 87    |      |      |       |
| $\psi_{74}$          | 0.0  | 0.00  |       | 0.00 | 0.00 | 0.00 |      | 90    |      |      |       |
| $\psi_{75}$          | 0.0  | -0.00 |       | 0.00 | 0.01 | 0.01 |      | 86    |      |      |       |
| $\psi_{76}$          | 0.0  | -0.00 |       | 0.00 | 0.00 | 0.00 |      | 90    |      |      |       |
| $\psi_{81}$          | 0.0  | 0.00  |       | 0.01 | 0.01 | 0.01 |      | 89    |      |      |       |
| $\psi_{82}$          | 0.0  | -0.00 |       | 0.01 | 0.01 | 0.01 |      | 91    |      |      |       |
| $\psi_{83}$          | 0.0  | 0.00  |       | 0.00 | 0.01 | 0.01 |      | 87    |      |      |       |

*Continued on next page*

Table S11 – *Continued from previous page*

| Par              | True | Bias  | RBias | SE   | MCSE | RMSE | SENS | CR(%) | ESS | %ESS | %Rhat |
|------------------|------|-------|-------|------|------|------|------|-------|-----|------|-------|
| $\psi_{84}$      | 0.0  | -0.00 |       | 0.00 | 0.01 | 0.01 |      | 87    |     |      |       |
| $\psi_{85}$      | 0.0  | 0.00  |       | 0.00 | 0.01 | 0.01 |      | 89    |     |      |       |
| $\psi_{86}$      | 0.0  | 0.00  |       | 0.00 | 0.01 | 0.01 |      | 84    |     |      |       |
| $\psi_{87}$      | 0.0  | 0.00  |       | 0.00 | 0.01 | 0.01 |      | 70    |     |      |       |
| $\psi_{91}$      | 0.0  | 0.00  |       | 0.01 | 0.01 | 0.01 |      | 96    |     |      |       |
| $\psi_{92}$      | 0.0  | -0.00 |       | 0.01 | 0.01 | 0.01 |      | 96    |     |      |       |
| $\psi_{93}$      | 0.0  | 0.00  |       | 0.00 | 0.00 | 0.00 |      | 98    |     |      |       |
| $\psi_{94}$      | 0.0  | -0.00 |       | 0.00 | 0.00 | 0.00 |      | 95    |     |      |       |
| $\psi_{95}$      | 0.0  | 0.00  |       | 0.00 | 0.00 | 0.00 |      | 94    |     |      |       |
| $\psi_{96}$      | 0.0  | 0.00  |       | 0.00 | 0.00 | 0.00 |      | 96    |     |      |       |
| $\psi_{97}$      | 0.0  | 0.01  |       | 0.01 | 0.01 | 0.01 |      | 69    |     |      |       |
| $\psi_{98}$      | 0.0  | -0.00 |       | 0.01 | 0.01 | 0.01 |      | 81    |     |      |       |
| $\mu_{1,i}$      |      | 0.00  | 1.84  | 0.22 | 0.37 | 0.34 | 0.63 | 82    |     |      |       |
| $\mu_{2,i}$      |      | -0.00 | -0.24 | 0.21 | 0.37 | 0.34 | 0.67 | 81    |     |      |       |
| $a_{1,i}$        |      | -0.00 | -0.63 | 0.08 | 0.21 | 0.17 | 0.75 | 78    |     |      |       |
| $a_{2,i}$        |      | 0.00  | 0.06  | 0.08 | 0.22 | 0.17 | 0.75 | 79    |     |      |       |
| $b_{1,i}$        |      | 0.00  | -0.89 | 0.08 | 0.22 | 0.17 | 0.47 | 78    |     |      |       |
| $b_{2,i}$        |      | 0.00  | -1.68 | 0.08 | 0.21 | 0.17 | 0.48 | 78    |     |      |       |
| $\sigma_{1,i}^2$ |      | -0.06 | 0.33  | 0.80 | 3.45 | 2.65 | 1.00 | 74    |     |      |       |
| $\sigma_{2,i}^2$ |      | -0.03 | 0.34  | 0.80 | 3.49 | 2.75 | 1.00 | 74    |     |      |       |
| $r_i$            |      | -0.01 | 0.50  | 0.12 | 0.30 | 0.26 | 0.72 | 75    |     |      |       |

Table S12

*Simulation results for Mplus under the high stability condition ( $N = 100$  persons,  $T = 60$  time points)*

| Par                  | True | Bias  | RBias | SE   | MCSE | RMSE | SENS | CR(%) | ESS  | %ESS | %Rhat |
|----------------------|------|-------|-------|------|------|------|------|-------|------|------|-------|
| $\mu_1$              | 0.5  | -0.03 | -0.06 | 0.08 | 0.08 | 0.08 | 1.00 | 93    | 714  | 19   | 100   |
| $\alpha_{\mu_1}$     | -0.3 | 0.01  | -0.05 | 0.11 | 0.12 | 0.12 | 0.76 | 91    | 559  | 3    | 100   |
| $\mu_2$              | 0.5  | -0.02 | -0.05 | 0.06 | 0.07 | 0.07 | 1.00 | 93    | 911  | 77   | 100   |
| $\alpha_{\mu_2}$     | 0.3  | -0.01 | -0.05 | 0.09 | 0.09 | 0.10 | 0.91 | 96    | 692  | 14   | 100   |
| $a_1$                | 0.6  | -0.02 | -0.03 | 0.02 | 0.01 | 0.02 | 1.00 | 81    | 1372 | 100  | 100   |
| $\alpha_{a_1}$       | -0.2 | 0.02  | -0.10 | 0.02 | 0.02 | 0.03 | 1.00 | 88    | 1004 | 89   | 100   |
| $a_2$                | 0.5  | -0.01 | -0.02 | 0.02 | 0.01 | 0.02 | 1.00 | 97    | 1161 | 100  | 100   |
| $\alpha_{a_2}$       | 0.2  | -0.02 | -0.08 | 0.03 | 0.03 | 0.03 | 1.00 | 83    | 854  | 62   | 100   |
| $b_1$                | -0.1 | 0.01  | -0.06 | 0.02 | 0.02 | 0.02 | 1.00 | 93    | 829  | 52   | 100   |
| $\alpha_{b_1}$       | -0.2 | -0.01 | 0.03  | 0.03 | 0.03 | 0.03 | 1.00 | 95    | 912  | 79   | 100   |
| $b_2$                | -0.1 | -0.00 | 0.02  | 0.02 | 0.02 | 0.02 | 1.00 | 94    | 903  | 75   | 100   |
| $\alpha_{b_2}$       | 0.2  | 0.00  | 0.00  | 0.03 | 0.03 | 0.03 | 1.00 | 98    | 1001 | 88   | 100   |
| $l\sigma_1$          | 0.5  | 0.01  | 0.03  | 0.01 | 0.04 | 0.04 | 1.00 | 45    |      |      |       |
| $\alpha_{l\sigma_1}$ | -0.3 | 0.03  | -0.11 | 0.01 | 0.03 | 0.05 | 1.00 | 28    |      |      |       |
| $l\sigma_2$          | 0.5  | 0.01  | 0.01  | 0.01 | 0.03 | 0.03 | 1.00 | 53    |      |      |       |
| $\alpha_{l\sigma_2}$ | 0.3  | -0.03 | -0.10 | 0.01 | 0.03 | 0.04 | 1.00 | 31    |      |      |       |
| $z$                  | 0.5  | -0.03 | -0.05 | 0.02 | 0.03 | 0.04 | 1.00 | 61    |      |      |       |
| $\alpha_z$           | -0.3 | 0.07  | -0.23 | 0.02 | 0.04 | 0.08 | 1.00 | 28    |      |      |       |
| $\psi_1$             | 0.3  | 0.02  | 0.06  | 0.06 | 0.04 | 0.04 | 1.00 | 99    | 839  | 54   | 100   |
| $\psi_2$             | 0.3  | -0.00 | -0.01 | 0.05 | 0.04 | 0.04 | 1.00 | 98    | 1226 | 95   | 100   |
| $\psi_3$             | 0.1  | 0.01  | 0.07  | 0.01 | 0.01 | 0.01 | 1.00 | 98    | 1061 | 91   | 100   |
| $\psi_4$             | 0.1  | 0.01  | 0.11  | 0.01 | 0.01 | 0.02 | 1.00 | 94    | 1037 | 97   | 100   |
| $\psi_5$             | 0.1  | 0.01  | 0.14  | 0.02 | 0.01 | 0.02 | 1.00 | 90    | 1066 | 87   | 100   |
| $\psi_6$             | 0.1  | 0.01  | 0.09  | 0.01 | 0.01 | 0.01 | 1.00 | 94    | 1350 | 100  | 100   |
| $\psi_7$             | 0.3  | 0.00  | 0.01  | 0.01 | 0.02 | 0.02 | 1.00 | 66    |      |      |       |
| $\psi_8$             | 0.3  | -0.01 | -0.02 | 0.01 | 0.02 | 0.02 | 1.00 | 68    |      |      |       |
| $\psi_9$             | 0.3  | 0.04  | 0.13  | 0.02 | 0.03 | 0.05 | 1.00 | 39    |      |      |       |
| $\psi_{21}$          | -0.0 | 0.02  | -0.42 | 0.03 | 0.02 | 0.03 | 0.05 | 96    | 898  | 70   | 100   |
| $\psi_{31}$          | 0.0  | -0.01 | -0.63 | 0.01 | 0.01 | 0.01 | 0.04 | 89    | 1038 | 91   | 100   |
| $\psi_{42}$          | 0.0  | -0.01 | -0.39 | 0.01 | 0.01 | 0.01 | 0.14 | 90    | 1162 | 94   | 100   |
| $\psi_{32}$          | 0.0  | 0.00  |       | 0.01 | 0.00 | 0.00 |      | 99    | 1074 | 90   | 100   |
| $\psi_{41}$          | 0.0  | 0.00  |       | 0.01 | 0.01 | 0.01 |      | 100   | 934  | 77   | 100   |
| $\psi_{43}$          | 0.0  | 0.00  |       | 0.00 | 0.00 | 0.00 |      | 100   | 1001 | 93   | 100   |
| $\psi_{51}$          | 0.0  | -0.00 |       | 0.01 | 0.01 | 0.01 |      | 100   | 942  | 80   | 100   |
| $\psi_{52}$          | 0.0  | -0.00 |       | 0.01 | 0.01 | 0.01 |      | 99    | 983  | 84   | 100   |
| $\psi_{53}$          | 0.0  | 0.00  |       | 0.00 | 0.00 | 0.00 |      | 100   | 1070 | 94   | 100   |
| $\psi_{54}$          | 0.0  | 0.00  |       | 0.00 | 0.00 | 0.00 |      | 99    | 938  | 79   | 100   |
| $\psi_{61}$          | 0.0  | -0.00 |       | 0.01 | 0.01 | 0.01 |      | 100   | 1032 | 88   | 100   |
| $\psi_{62}$          | 0.0  | 0.00  |       | 0.01 | 0.00 | 0.00 |      | 100   | 1279 | 98   | 100   |
| $\psi_{63}$          | 0.0  | 0.00  |       | 0.00 | 0.00 | 0.00 |      | 99    | 1059 | 92   | 100   |
| $\psi_{64}$          | 0.0  | 0.00  |       | 0.00 | 0.00 | 0.00 |      | 100   | 1157 | 98   | 100   |
| $\psi_{65}$          | 0.0  | 0.00  |       | 0.00 | 0.00 | 0.00 |      | 99    | 981  | 88   | 100   |
| $\psi_{71}$          | 0.0  | -0.00 |       | 0.02 | 0.02 | 0.02 |      | 86    |      |      |       |
| $\psi_{72}$          | 0.0  | -0.00 |       | 0.01 | 0.01 | 0.01 |      | 87    |      |      |       |
| $\psi_{73}$          | 0.0  | 0.00  |       | 0.00 | 0.00 | 0.00 |      | 82    |      |      |       |
| $\psi_{74}$          | 0.0  | -0.00 |       | 0.00 | 0.01 | 0.01 |      | 82    |      |      |       |
| $\psi_{75}$          | 0.0  | 0.00  |       | 0.00 | 0.00 | 0.00 |      | 88    |      |      |       |
| $\psi_{76}$          | 0.0  | -0.00 |       | 0.00 | 0.00 | 0.00 |      | 93    |      |      |       |
| $\psi_{81}$          | 0.0  | 0.00  |       | 0.02 | 0.02 | 0.02 |      | 88    |      |      |       |
| $\psi_{82}$          | 0.0  | -0.00 |       | 0.01 | 0.02 | 0.02 |      | 87    |      |      |       |
| $\psi_{83}$          | 0.0  | -0.00 |       | 0.00 | 0.00 | 0.00 |      | 88    |      |      |       |

*Continued on next page*

Table S12 – *Continued from previous page*

| Par              | True | Bias  | RBias | SE   | MCSE | RMSE | SENS | CR(%) | ESS | %ESS | %Rhat |
|------------------|------|-------|-------|------|------|------|------|-------|-----|------|-------|
| $\psi_{84}$      | 0.0  | -0.00 |       | 0.00 | 0.01 | 0.01 |      | 88    |     |      |       |
| $\psi_{85}$      | 0.0  | -0.00 |       | 0.00 | 0.01 | 0.01 |      | 88    |     |      |       |
| $\psi_{86}$      | 0.0  | -0.00 |       | 0.00 | 0.00 | 0.00 |      | 92    |     |      |       |
| $\psi_{87}$      | 0.0  | 0.00  |       | 0.00 | 0.01 | 0.01 |      | 69    |     |      |       |
| $\psi_{91}$      | 0.0  | -0.00 |       | 0.01 | 0.02 | 0.02 |      | 89    |     |      |       |
| $\psi_{92}$      | 0.0  | -0.00 |       | 0.01 | 0.01 | 0.01 |      | 93    |     |      |       |
| $\psi_{93}$      | 0.0  | -0.00 |       | 0.00 | 0.00 | 0.00 |      | 92    |     |      |       |
| $\psi_{94}$      | 0.0  | -0.00 |       | 0.00 | 0.00 | 0.00 |      | 88    |     |      |       |
| $\psi_{95}$      | 0.0  | -0.00 |       | 0.00 | 0.00 | 0.00 |      | 93    |     |      |       |
| $\psi_{96}$      | 0.0  | 0.00  |       | 0.00 | 0.00 | 0.00 |      | 95    |     |      |       |
| $\psi_{97}$      | 0.0  | 0.01  |       | 0.01 | 0.02 | 0.02 |      | 69    |     |      |       |
| $\psi_{98}$      | 0.0  | -0.00 |       | 0.01 | 0.02 | 0.02 |      | 75    |     |      |       |
| $\mu_{1,i}$      |      | -0.01 | -3.01 | 0.25 | 0.34 | 0.37 | 0.49 | 83    |     |      |       |
| $\mu_{2,i}$      |      | -0.01 | -0.49 | 0.23 | 0.35 | 0.36 | 0.59 | 82    |     |      |       |
| $a_{1,i}$        |      | -0.00 | 0.00  | 0.07 | 0.19 | 0.15 | 0.99 | 77    |     |      |       |
| $a_{2,i}$        |      | -0.00 | -4.82 | 0.07 | 0.20 | 0.16 | 0.96 | 78    |     |      |       |
| $b_{1,i}$        |      | 0.01  | -0.11 | 0.08 | 0.22 | 0.17 | 0.52 | 77    |     |      |       |
| $b_{2,i}$        |      | -0.00 | 0.45  | 0.07 | 0.21 | 0.17 | 0.52 | 77    |     |      |       |
| $\sigma_{1,i}^2$ |      | 0.07  | 0.46  | 0.83 | 4.68 | 4.05 | 1.00 | 74    |     |      |       |
| $\sigma_{2,i}^2$ |      | 0.03  | 0.36  | 0.81 | 3.98 | 3.37 | 1.00 | 73    |     |      |       |
| $r_i$            |      | -0.01 | -0.37 | 0.12 | 0.30 | 0.26 | 0.71 | 75    |     |      |       |

Table S13

*Simulation results for Mplus under the low stability condition ( $N = 60$  persons,  $T = 100$  time points)*

| Par                  | True | Bias  | RBias | SE   | MCSE | RMSE | SENS | CR(%) | ESS  | %ESS | %Rhat |
|----------------------|------|-------|-------|------|------|------|------|-------|------|------|-------|
| $\mu_1$              | 0.5  | 0.01  | 0.01  | 0.06 | 0.06 | 0.06 | 1.00 | 95    | 1356 | 97   | 100   |
| $\alpha_{\mu_1}$     | -0.3 | 0.01  | -0.04 | 0.09 | 0.10 | 0.10 | 0.84 | 92    | 1256 | 98   | 100   |
| $\mu_2$              | 0.5  | -0.02 | -0.03 | 0.06 | 0.06 | 0.06 | 1.00 | 93    | 1401 | 100  | 100   |
| $\alpha_{\mu_2}$     | 0.3  | -0.01 | -0.03 | 0.09 | 0.09 | 0.09 | 0.92 | 94    | 1351 | 98   | 100   |
| $a_1$                | 0.3  | -0.00 | -0.00 | 0.02 | 0.02 | 0.02 | 1.00 | 94    | 1326 | 99   | 100   |
| $\alpha_{a_1}$       | -0.2 | 0.00  | -0.01 | 0.03 | 0.03 | 0.03 | 1.00 | 96    | 1014 | 91   | 100   |
| $a_2$                | 0.3  | -0.00 | -0.00 | 0.02 | 0.02 | 0.02 | 1.00 | 94    | 1243 | 100  | 100   |
| $\alpha_{a_2}$       | 0.2  | 0.00  | 0.02  | 0.03 | 0.03 | 0.03 | 1.00 | 93    | 953  | 77   | 100   |
| $b_1$                | -0.1 | 0.00  | -0.05 | 0.02 | 0.02 | 0.02 | 0.98 | 93    | 900  | 69   | 100   |
| $\alpha_{b_1}$       | -0.2 | -0.00 | 0.01  | 0.03 | 0.03 | 0.03 | 1.00 | 96    | 986  | 77   | 100   |
| $b_2$                | -0.1 | 0.00  | -0.01 | 0.02 | 0.02 | 0.02 | 1.00 | 96    | 814  | 49   | 100   |
| $\alpha_{b_2}$       | 0.2  | 0.00  | 0.01  | 0.03 | 0.03 | 0.03 | 1.00 | 95    | 969  | 86   | 100   |
| $l\sigma_1$          | 0.5  | 0.01  | 0.01  | 0.01 | 0.04 | 0.04 | 1.00 | 38    |      |      |       |
| $\alpha_{l\sigma_1}$ | -0.3 | 0.02  | -0.05 | 0.01 | 0.04 | 0.04 | 1.00 | 46    |      |      |       |
| $l\sigma_2$          | 0.5  | 0.01  | 0.01  | 0.01 | 0.04 | 0.04 | 1.00 | 37    |      |      |       |
| $\alpha_{l\sigma_2}$ | 0.3  | -0.02 | -0.08 | 0.01 | 0.04 | 0.05 | 1.00 | 32    |      |      |       |
| $z$                  | 0.5  | -0.02 | -0.04 | 0.02 | 0.04 | 0.04 | 1.00 | 58    |      |      |       |
| $\alpha_z$           | -0.3 | 0.05  | -0.16 | 0.02 | 0.04 | 0.06 | 1.00 | 34    |      |      |       |
| $\psi_1$             | 0.3  | 0.03  | 0.09  | 0.05 | 0.04 | 0.05 | 1.00 | 97    | 1492 | 97   | 100   |
| $\psi_2$             | 0.3  | 0.01  | 0.02  | 0.05 | 0.04 | 0.04 | 1.00 | 100   | 1974 | 100  | 100   |
| $\psi_3$             | 0.1  | 0.02  | 0.17  | 0.02 | 0.01 | 0.02 | 1.00 | 91    | 1166 | 97   | 100   |
| $\psi_4$             | 0.1  | 0.02  | 0.17  | 0.02 | 0.01 | 0.02 | 1.00 | 94    | 1254 | 100  | 100   |
| $\psi_5$             | 0.1  | 0.02  | 0.21  | 0.02 | 0.01 | 0.02 | 1.00 | 87    | 1204 | 91   | 100   |
| $\psi_6$             | 0.1  | 0.02  | 0.15  | 0.02 | 0.01 | 0.02 | 1.00 | 96    | 1461 | 100  | 100   |
| $\psi_7$             | 0.3  | -0.01 | -0.02 | 0.01 | 0.03 | 0.03 | 1.00 | 63    |      |      |       |
| $\psi_8$             | 0.3  | -0.01 | -0.03 | 0.01 | 0.03 | 0.03 | 1.00 | 56    |      |      |       |
| $\psi_9$             | 0.3  | 0.02  | 0.07  | 0.02 | 0.03 | 0.03 | 1.00 | 70    |      |      |       |
| $\psi_{21}$          | -0.0 | 0.01  | -0.22 | 0.03 | 0.02 | 0.02 | 0.31 | 94    | 1537 | 100  | 100   |
| $\psi_{31}$          | 0.0  | -0.01 | -0.36 | 0.01 | 0.01 | 0.01 | 0.12 | 93    | 1259 | 99   | 100   |
| $\psi_{42}$          | 0.0  | -0.00 | -0.30 | 0.01 | 0.01 | 0.01 | 0.20 | 97    | 1436 | 100  | 100   |
| $\psi_{32}$          | 0.0  | -0.00 |       | 0.01 | 0.01 | 0.01 |      | 98    | 1318 | 99   | 100   |
| $\psi_{41}$          | 0.0  | -0.00 |       | 0.01 | 0.01 | 0.01 |      | 99    | 1182 | 98   | 100   |
| $\psi_{43}$          | 0.0  | -0.00 |       | 0.00 | 0.00 | 0.00 |      | 100   | 1202 | 98   | 100   |
| $\psi_{51}$          | 0.0  | -0.00 |       | 0.01 | 0.01 | 0.01 |      | 100   | 1228 | 95   | 100   |
| $\psi_{52}$          | 0.0  | 0.00  |       | 0.01 | 0.01 | 0.01 |      | 99    | 1242 | 99   | 100   |
| $\psi_{53}$          | 0.0  | -0.00 |       | 0.00 | 0.00 | 0.00 |      | 99    | 1190 | 97   | 100   |
| $\psi_{54}$          | 0.0  | 0.00  |       | 0.00 | 0.00 | 0.00 |      | 99    | 1124 | 89   | 100   |
| $\psi_{61}$          | 0.0  | -0.00 |       | 0.01 | 0.01 | 0.01 |      | 99    | 1210 | 98   | 100   |
| $\psi_{62}$          | 0.0  | 0.00  |       | 0.01 | 0.01 | 0.01 |      | 100   | 1536 | 100  | 100   |
| $\psi_{63}$          | 0.0  | 0.00  |       | 0.00 | 0.00 | 0.00 |      | 100   | 1223 | 96   | 100   |
| $\psi_{64}$          | 0.0  | -0.00 |       | 0.00 | 0.00 | 0.00 |      | 100   | 1308 | 99   | 100   |
| $\psi_{65}$          | 0.0  | -0.00 |       | 0.00 | 0.00 | 0.00 |      | 100   | 1135 | 92   | 100   |
| $\psi_{71}$          | 0.0  | 0.00  |       | 0.01 | 0.02 | 0.02 |      | 81    |      |      |       |
| $\psi_{72}$          | 0.0  | -0.00 |       | 0.01 | 0.02 | 0.02 |      | 79    |      |      |       |
| $\psi_{73}$          | 0.0  | 0.00  |       | 0.00 | 0.01 | 0.01 |      | 84    |      |      |       |
| $\psi_{74}$          | 0.0  | 0.00  |       | 0.00 | 0.01 | 0.01 |      | 86    |      |      |       |
| $\psi_{75}$          | 0.0  | -0.00 |       | 0.00 | 0.01 | 0.01 |      | 84    |      |      |       |
| $\psi_{76}$          | 0.0  | -0.00 |       | 0.00 | 0.01 | 0.01 |      | 93    |      |      |       |
| $\psi_{81}$          | 0.0  | -0.00 |       | 0.01 | 0.02 | 0.02 |      | 72    |      |      |       |
| $\psi_{82}$          | 0.0  | 0.00  |       | 0.01 | 0.02 | 0.02 |      | 80    |      |      |       |
| $\psi_{83}$          | 0.0  | -0.00 |       | 0.00 | 0.01 | 0.01 |      | 85    |      |      |       |

*Continued on next page*

Table S13 – *Continued from previous page*

| Par              | True | Bias  | RBias | SE   | MCSE | RMSE | SENS | CR(%) | ESS | %ESS | %Rhat |
|------------------|------|-------|-------|------|------|------|------|-------|-----|------|-------|
| $\psi_{84}$      | 0.0  | -0.00 |       | 0.00 | 0.01 | 0.01 |      | 82    |     |      |       |
| $\psi_{85}$      | 0.0  | -0.00 |       | 0.00 | 0.01 | 0.01 |      | 83    |     |      |       |
| $\psi_{86}$      | 0.0  | -0.00 |       | 0.00 | 0.01 | 0.01 |      | 85    |     |      |       |
| $\psi_{87}$      | 0.0  | 0.00  |       | 0.00 | 0.01 | 0.01 |      | 57    |     |      |       |
| $\psi_{91}$      | 0.0  | 0.00  |       | 0.01 | 0.01 | 0.01 |      | 86    |     |      |       |
| $\psi_{92}$      | 0.0  | -0.00 |       | 0.01 | 0.01 | 0.01 |      | 91    |     |      |       |
| $\psi_{93}$      | 0.0  | 0.00  |       | 0.00 | 0.00 | 0.00 |      | 93    |     |      |       |
| $\psi_{94}$      | 0.0  | -0.00 |       | 0.00 | 0.00 | 0.00 |      | 91    |     |      |       |
| $\psi_{95}$      | 0.0  | -0.00 |       | 0.00 | 0.00 | 0.00 |      | 91    |     |      |       |
| $\psi_{96}$      | 0.0  | 0.00  |       | 0.00 | 0.00 | 0.00 |      | 92    |     |      |       |
| $\psi_{97}$      | 0.0  | 0.00  |       | 0.01 | 0.01 | 0.01 |      | 72    |     |      |       |
| $\psi_{98}$      | 0.0  | -0.00 |       | 0.01 | 0.01 | 0.01 |      | 80    |     |      |       |
| $\mu_{1,i}$      |      | 0.00  | 1.80  | 0.19 | 0.39 | 0.34 | 0.68 | 80    |     |      |       |
| $\mu_{2,i}$      |      | -0.01 | 1.21  | 0.18 | 0.38 | 0.34 | 0.71 | 79    |     |      |       |
| $a_{1,i}$        |      | -0.00 | 0.99  | 0.07 | 0.22 | 0.17 | 0.78 | 78    |     |      |       |
| $a_{2,i}$        |      | 0.00  | 1.81  | 0.07 | 0.22 | 0.17 | 0.79 | 78    |     |      |       |
| $b_{1,i}$        |      | 0.00  | -1.16 | 0.08 | 0.22 | 0.17 | 0.50 | 77    |     |      |       |
| $b_{2,i}$        |      | 0.00  | -0.22 | 0.07 | 0.22 | 0.17 | 0.50 | 77    |     |      |       |
| $\sigma_{1,i}^2$ |      | -0.04 | 0.32  | 0.63 | 3.47 | 2.52 | 1.00 | 72    |     |      |       |
| $\sigma_{2,i}^2$ |      | -0.03 | 0.35  | 0.63 | 3.57 | 2.63 | 1.00 | 72    |     |      |       |
| $r_i$            |      | -0.01 | 1.65  | 0.10 | 0.30 | 0.24 | 0.76 | 74    |     |      |       |



Table S14

*Simulation results for Mplus under the high stability condition ( $N = 60$  persons,  $T = 100$  time points)*

| Par                  | True | Bias  | RBias | SE   | MCSE | RMSE | SENS | CR(%) | ESS  | %ESS | %Rhat |
|----------------------|------|-------|-------|------|------|------|------|-------|------|------|-------|
| $\mu_1$              | 0.5  | -0.03 | -0.05 | 0.08 | 0.08 | 0.09 | 1.00 | 97    | 948  | 78   | 100   |
| $\alpha_{\mu_1}$     | -0.3 | 0.01  | -0.04 | 0.12 | 0.12 | 0.12 | 0.61 | 98    | 771  | 37   | 100   |
| $\mu_2$              | 0.5  | -0.01 | -0.03 | 0.07 | 0.08 | 0.08 | 1.00 | 92    | 1165 | 97   | 100   |
| $\alpha_{\mu_2}$     | 0.3  | -0.01 | -0.03 | 0.10 | 0.10 | 0.10 | 0.79 | 95    | 973  | 76   | 100   |
| $a_1$                | 0.6  | -0.02 | -0.03 | 0.02 | 0.02 | 0.02 | 1.00 | 89    | 1992 | 100  | 100   |
| $\alpha_{a_1}$       | -0.2 | 0.02  | -0.12 | 0.03 | 0.03 | 0.04 | 1.00 | 81    | 1416 | 100  | 100   |
| $a_2$                | 0.5  | -0.01 | -0.02 | 0.02 | 0.02 | 0.02 | 1.00 | 97    | 1617 | 100  | 100   |
| $\alpha_{a_2}$       | 0.2  | -0.02 | -0.08 | 0.03 | 0.03 | 0.03 | 1.00 | 92    | 1174 | 97   | 100   |
| $b_1$                | -0.1 | 0.00  | -0.05 | 0.02 | 0.02 | 0.02 | 1.00 | 95    | 1141 | 99   | 100   |
| $\alpha_{b_1}$       | -0.2 | -0.01 | 0.03  | 0.03 | 0.03 | 0.03 | 1.00 | 94    | 1155 | 90   | 100   |
| $b_2$                | -0.1 | -0.01 | 0.05  | 0.02 | 0.02 | 0.02 | 1.00 | 94    | 1172 | 95   | 100   |
| $\alpha_{b_2}$       | 0.2  | 0.00  | 0.00  | 0.03 | 0.03 | 0.03 | 1.00 | 97    | 1257 | 99   | 100   |
| $l\sigma_1$          | 0.5  | 0.01  | 0.02  | 0.01 | 0.05 | 0.05 | 1.00 | 36    |      |      |       |
| $\alpha_{l\sigma_1}$ | -0.3 | 0.02  | -0.06 | 0.01 | 0.04 | 0.04 | 1.00 | 38    |      |      |       |
| $l\sigma_2$          | 0.5  | 0.01  | 0.02  | 0.01 | 0.04 | 0.04 | 1.00 | 41    |      |      |       |
| $\alpha_{l\sigma_2}$ | 0.3  | -0.03 | -0.09 | 0.01 | 0.04 | 0.04 | 1.00 | 35    |      |      |       |
| $z$                  | 0.5  | -0.02 | -0.04 | 0.02 | 0.04 | 0.05 | 1.00 | 60    |      |      |       |
| $\alpha_z$           | -0.3 | 0.05  | -0.17 | 0.02 | 0.04 | 0.07 | 1.00 | 35    |      |      |       |
| $\psi_1$             | 0.3  | 0.03  | 0.10  | 0.07 | 0.04 | 0.05 | 1.00 | 99    | 1174 | 86   | 100   |
| $\psi_2$             | 0.3  | 0.01  | 0.02  | 0.05 | 0.04 | 0.04 | 1.00 | 100   | 1619 | 100  | 100   |
| $\psi_3$             | 0.1  | 0.01  | 0.11  | 0.02 | 0.01 | 0.01 | 1.00 | 98    | 1601 | 100  | 100   |
| $\psi_4$             | 0.1  | 0.01  | 0.13  | 0.02 | 0.01 | 0.02 | 1.00 | 92    | 1505 | 99   | 100   |
| $\psi_5$             | 0.1  | 0.02  | 0.16  | 0.02 | 0.01 | 0.02 | 1.00 | 93    | 1355 | 98   | 100   |
| $\psi_6$             | 0.1  | 0.01  | 0.10  | 0.02 | 0.01 | 0.01 | 1.00 | 97    | 1807 | 100  | 100   |
| $\psi_7$             | 0.3  | -0.01 | -0.02 | 0.01 | 0.02 | 0.03 | 1.00 | 64    |      |      |       |
| $\psi_8$             | 0.3  | -0.01 | -0.02 | 0.01 | 0.03 | 0.03 | 1.00 | 60    |      |      |       |
| $\psi_9$             | 0.3  | 0.02  | 0.07  | 0.02 | 0.03 | 0.04 | 1.00 | 66    |      |      |       |
| $\psi_{21}$          | -0.0 | 0.01  | -0.31 | 0.03 | 0.02 | 0.03 | 0.08 | 100   | 1263 | 91   | 100   |
| $\psi_{31}$          | 0.0  | -0.01 | -0.43 | 0.01 | 0.01 | 0.01 | 0.05 | 97    | 1414 | 97   | 100   |
| $\psi_{42}$          | 0.0  | -0.01 | -0.41 | 0.01 | 0.01 | 0.01 | 0.09 | 94    | 1576 | 100  | 100   |
| $\psi_{32}$          | 0.0  | 0.00  |       | 0.01 | 0.01 | 0.01 |      | 100   | 1536 | 100  | 100   |
| $\psi_{41}$          | 0.0  | 0.00  |       | 0.01 | 0.01 | 0.01 |      | 100   | 1324 | 96   | 100   |
| $\psi_{43}$          | 0.0  | 0.00  |       | 0.00 | 0.00 | 0.00 |      | 100   | 1474 | 100  | 100   |
| $\psi_{51}$          | 0.0  | 0.00  |       | 0.01 | 0.01 | 0.01 |      | 99    | 1275 | 94   | 100   |
| $\psi_{52}$          | 0.0  | -0.00 |       | 0.01 | 0.01 | 0.01 |      | 100   | 1364 | 98   | 100   |
| $\psi_{53}$          | 0.0  | 0.00  |       | 0.00 | 0.00 | 0.00 |      | 100   | 1512 | 99   | 100   |
| $\psi_{54}$          | 0.0  | 0.00  |       | 0.00 | 0.00 | 0.00 |      | 100   | 1259 | 95   | 100   |
| $\psi_{61}$          | 0.0  | -0.00 |       | 0.01 | 0.01 | 0.01 |      | 100   | 1415 | 100  | 100   |
| $\psi_{62}$          | 0.0  | -0.00 |       | 0.01 | 0.00 | 0.00 |      | 100   | 1672 | 100  | 100   |
| $\psi_{63}$          | 0.0  | 0.00  |       | 0.00 | 0.00 | 0.00 |      | 99    | 1536 | 100  | 100   |
| $\psi_{64}$          | 0.0  | -0.00 |       | 0.00 | 0.00 | 0.00 |      | 100   | 1668 | 100  | 100   |
| $\psi_{65}$          | 0.0  | 0.00  |       | 0.00 | 0.00 | 0.00 |      | 100   | 1377 | 100  | 100   |
| $\psi_{71}$          | 0.0  | -0.00 |       | 0.02 | 0.02 | 0.02 |      | 95    |      |      |       |
| $\psi_{72}$          | 0.0  | 0.00  |       | 0.01 | 0.01 | 0.01 |      | 92    |      |      |       |
| $\psi_{73}$          | 0.0  | 0.00  |       | 0.00 | 0.01 | 0.01 |      | 79    |      |      |       |
| $\psi_{74}$          | 0.0  | 0.00  |       | 0.00 | 0.00 | 0.00 |      | 85    |      |      |       |
| $\psi_{75}$          | 0.0  | -0.00 |       | 0.00 | 0.01 | 0.01 |      | 84    |      |      |       |
| $\psi_{76}$          | 0.0  | -0.00 |       | 0.00 | 0.00 | 0.00 |      | 83    |      |      |       |
| $\psi_{81}$          | 0.0  | 0.00  |       | 0.02 | 0.02 | 0.02 |      | 92    |      |      |       |
| $\psi_{82}$          | 0.0  | -0.00 |       | 0.01 | 0.02 | 0.02 |      | 89    |      |      |       |
| $\psi_{83}$          | 0.0  | 0.00  |       | 0.00 | 0.01 | 0.01 |      | 82    |      |      |       |

*Continued on next page*

Table S14 – *Continued from previous page*

| Par              | True | Bias  | RBias | SE   | MCSE | RMSE | SENS | CR(%) | ESS | %ESS | %Rhat |
|------------------|------|-------|-------|------|------|------|------|-------|-----|------|-------|
| $\psi_{84}$      | 0.0  | -0.00 |       | 0.00 | 0.01 | 0.01 |      | 76    |     |      |       |
| $\psi_{85}$      | 0.0  | -0.00 |       | 0.00 | 0.01 | 0.01 |      | 80    |     |      |       |
| $\psi_{86}$      | 0.0  | 0.00  |       | 0.00 | 0.01 | 0.01 |      | 89    |     |      |       |
| $\psi_{87}$      | 0.0  | 0.00  |       | 0.00 | 0.01 | 0.01 |      | 56    |     |      |       |
| $\psi_{91}$      | 0.0  | -0.00 |       | 0.01 | 0.02 | 0.02 |      | 96    |     |      |       |
| $\psi_{92}$      | 0.0  | 0.00  |       | 0.01 | 0.01 | 0.01 |      | 96    |     |      |       |
| $\psi_{93}$      | 0.0  | -0.00 |       | 0.00 | 0.00 | 0.00 |      | 93    |     |      |       |
| $\psi_{94}$      | 0.0  | -0.00 |       | 0.00 | 0.00 | 0.00 |      | 90    |     |      |       |
| $\psi_{95}$      | 0.0  | -0.00 |       | 0.00 | 0.00 | 0.00 |      | 92    |     |      |       |
| $\psi_{96}$      | 0.0  | -0.00 |       | 0.00 | 0.00 | 0.00 |      | 94    |     |      |       |
| $\psi_{97}$      | 0.0  | 0.00  |       | 0.01 | 0.01 | 0.01 |      | 68    |     |      |       |
| $\psi_{98}$      | 0.0  | -0.00 |       | 0.01 | 0.01 | 0.01 |      | 72    |     |      |       |
| $\mu_{1,i}$      |      | -0.01 | -0.05 | 0.24 | 0.35 | 0.36 | 0.53 | 83    |     |      |       |
| $\mu_{2,i}$      |      | -0.00 | 0.19  | 0.21 | 0.36 | 0.35 | 0.65 | 80    |     |      |       |
| $a_{1,i}$        |      | -0.00 | 0.06  | 0.06 | 0.19 | 0.15 | 0.99 | 76    |     |      |       |
| $a_{2,i}$        |      | -0.00 | 0.16  | 0.07 | 0.20 | 0.16 | 0.97 | 75    |     |      |       |
| $b_{1,i}$        |      | 0.00  | -0.33 | 0.07 | 0.22 | 0.17 | 0.56 | 74    |     |      |       |
| $b_{2,i}$        |      | -0.00 | -1.36 | 0.06 | 0.22 | 0.17 | 0.56 | 74    |     |      |       |
| $\sigma_{1,i}^2$ |      | -0.06 | 0.36  | 0.63 | 3.46 | 2.76 | 1.00 | 72    |     |      |       |
| $\sigma_{2,i}^2$ |      | -0.03 | 0.34  | 0.63 | 3.56 | 2.84 | 1.00 | 72    |     |      |       |
| $r_i$            |      | -0.01 | 1.97  | 0.10 | 0.30 | 0.24 | 0.76 | 72    |     |      |       |

Table S15

*Simulation results for Mplus under the high stability condition ( $N = 200$  persons,  $T = 100$  time points)*

| Par                  | True | Bias  | RBias | SE   | MCSE | RMSE | SENS | CR(%) | ESS  | %ESS | %Rhat |
|----------------------|------|-------|-------|------|------|------|------|-------|------|------|-------|
| $\mu_1$              | 0.5  | -0.03 | -0.06 | 0.04 | 0.04 | 0.05 | 1.00 | 94    | 919  | 81   | 100   |
| $\alpha_{\mu_1}$     | -0.3 | 0.01  | -0.02 | 0.07 | 0.07 | 0.07 | 0.99 | 94    | 791  | 43   | 100   |
| $\mu_2$              | 0.5  | -0.01 | -0.03 | 0.04 | 0.04 | 0.04 | 1.00 | 94    | 1196 | 100  | 100   |
| $\alpha_{\mu_2}$     | 0.3  | -0.01 | -0.05 | 0.06 | 0.06 | 0.06 | 1.00 | 91    | 1058 | 95   | 100   |
| $a_1$                | 0.6  | -0.02 | -0.03 | 0.01 | 0.01 | 0.02 | 1.00 | 56    | 1714 | 100  | 100   |
| $\alpha_{a_1}$       | -0.2 | 0.02  | -0.09 | 0.01 | 0.02 | 0.02 | 1.00 | 75    | 1423 | 100  | 100   |
| $a_2$                | 0.5  | -0.01 | -0.01 | 0.01 | 0.01 | 0.01 | 1.00 | 95    | 1443 | 100  | 100   |
| $\alpha_{a_2}$       | 0.2  | -0.02 | -0.10 | 0.02 | 0.02 | 0.03 | 1.00 | 72    | 1161 | 98   | 100   |
| $b_1$                | -0.1 | 0.00  | -0.05 | 0.01 | 0.01 | 0.01 | 1.00 | 92    | 1000 | 94   | 100   |
| $\alpha_{b_1}$       | -0.2 | -0.00 | 0.02  | 0.02 | 0.02 | 0.02 | 1.00 | 94    | 1137 | 97   | 100   |
| $b_2$                | -0.1 | -0.00 | 0.01  | 0.01 | 0.01 | 0.01 | 1.00 | 98    | 1091 | 98   | 100   |
| $\alpha_{b_2}$       | 0.2  | 0.00  | 0.01  | 0.02 | 0.02 | 0.02 | 1.00 | 96    | 1285 | 100  | 100   |
| $l\sigma_1$          | 0.5  | 0.01  | 0.01  | 0.01 | 0.03 | 0.03 | 1.00 | 28    |      |      |       |
| $\alpha_{l\sigma_1}$ | -0.3 | 0.02  | -0.06 | 0.01 | 0.02 | 0.03 | 1.00 | 35    |      |      |       |
| $l\sigma_2$          | 0.5  | 0.00  | 0.01  | 0.01 | 0.02 | 0.02 | 1.00 | 42    |      |      |       |
| $\alpha_{l\sigma_2}$ | 0.3  | -0.02 | -0.06 | 0.01 | 0.02 | 0.03 | 1.00 | 25    |      |      |       |
| $z$                  | 0.5  | -0.01 | -0.03 | 0.01 | 0.02 | 0.03 | 1.00 | 48    |      |      |       |
| $\alpha_z$           | -0.3 | 0.04  | -0.15 | 0.01 | 0.03 | 0.05 | 1.00 | 17    |      |      |       |
| $\psi_1$             | 0.3  | 0.00  | 0.01  | 0.04 | 0.04 | 0.04 | 1.00 | 96    | 884  | 69   | 100   |
| $\psi_2$             | 0.3  | -0.00 | -0.02 | 0.03 | 0.03 | 0.03 | 1.00 | 99    | 1321 | 99   | 100   |
| $\psi_3$             | 0.1  | -0.00 | -0.00 | 0.01 | 0.01 | 0.01 | 1.00 | 100   | 1087 | 98   | 100   |
| $\psi_4$             | 0.1  | 0.00  | 0.02  | 0.01 | 0.01 | 0.01 | 1.00 | 96    | 1035 | 93   | 100   |
| $\psi_5$             | 0.1  | 0.00  | 0.04  | 0.01 | 0.01 | 0.01 | 1.00 | 98    | 1110 | 94   | 100   |
| $\psi_6$             | 0.1  | 0.00  | 0.04  | 0.01 | 0.01 | 0.01 | 1.00 | 97    | 1348 | 99   | 100   |
| $\psi_7$             | 0.3  | 0.00  | 0.01  | 0.01 | 0.02 | 0.02 | 1.00 | 52    |      |      |       |
| $\psi_8$             | 0.3  | -0.00 | -0.01 | 0.01 | 0.01 | 0.01 | 1.00 | 59    |      |      |       |
| $\psi_9$             | 0.3  | 0.03  | 0.09  | 0.01 | 0.02 | 0.03 | 1.00 | 25    |      |      |       |
| $\psi_{21}$          | -0.0 | 0.01  | -0.21 | 0.02 | 0.02 | 0.02 | 0.58 | 93    | 872  | 71   | 100   |
| $\psi_{31}$          | 0.0  | -0.00 | -0.28 | 0.00 | 0.00 | 0.01 | 0.64 | 89    | 1017 | 90   | 100   |
| $\psi_{42}$          | 0.0  | -0.00 | -0.22 | 0.00 | 0.00 | 0.00 | 0.88 | 93    | 1160 | 99   | 100   |
| $\psi_{32}$          | 0.0  | -0.00 |       | 0.00 | 0.00 | 0.00 |      | 98    | 1014 | 97   | 100   |
| $\psi_{41}$          | 0.0  | 0.00  |       | 0.00 | 0.00 | 0.00 |      | 96    | 940  | 88   | 100   |
| $\psi_{43}$          | 0.0  | 0.00  |       | 0.00 | 0.00 | 0.00 |      | 93    | 1030 | 99   | 100   |
| $\psi_{51}$          | 0.0  | -0.00 |       | 0.00 | 0.00 | 0.00 |      | 99    | 1001 | 92   | 100   |
| $\psi_{52}$          | 0.0  | -0.00 |       | 0.00 | 0.00 | 0.00 |      | 100   | 859  | 68   | 100   |
| $\psi_{53}$          | 0.0  | 0.00  |       | 0.00 | 0.00 | 0.00 |      | 98    | 1039 | 96   | 100   |
| $\psi_{54}$          | 0.0  | -0.00 |       | 0.00 | 0.00 | 0.00 |      | 100   | 935  | 84   | 100   |
| $\psi_{61}$          | 0.0  | -0.00 |       | 0.01 | 0.00 | 0.00 |      | 98    | 852  | 67   | 100   |
| $\psi_{62}$          | 0.0  | 0.00  |       | 0.00 | 0.00 | 0.00 |      | 95    | 1243 | 100  | 100   |
| $\psi_{63}$          | 0.0  | -0.00 |       | 0.00 | 0.00 | 0.00 |      | 99    | 976  | 90   | 100   |
| $\psi_{64}$          | 0.0  | 0.00  |       | 0.00 | 0.00 | 0.00 |      | 98    | 1112 | 97   | 100   |
| $\psi_{65}$          | 0.0  | 0.00  |       | 0.00 | 0.00 | 0.00 |      | 97    | 779  | 39   | 100   |
| $\psi_{71}$          | 0.0  | -0.00 |       | 0.01 | 0.01 | 0.01 |      | 95    |      |      |       |
| $\psi_{72}$          | 0.0  | -0.00 |       | 0.01 | 0.01 | 0.01 |      | 82    |      |      |       |
| $\psi_{73}$          | 0.0  | -0.00 |       | 0.00 | 0.00 | 0.00 |      | 76    |      |      |       |
| $\psi_{74}$          | 0.0  | -0.00 |       | 0.00 | 0.00 | 0.00 |      | 73    |      |      |       |
| $\psi_{75}$          | 0.0  | 0.00  |       | 0.00 | 0.00 | 0.00 |      | 82    |      |      |       |
| $\psi_{76}$          | 0.0  | -0.00 |       | 0.00 | 0.00 | 0.00 |      | 81    |      |      |       |
| $\psi_{81}$          | 0.0  | 0.00  |       | 0.01 | 0.01 | 0.01 |      | 93    |      |      |       |
| $\psi_{82}$          | 0.0  | -0.00 |       | 0.01 | 0.01 | 0.01 |      | 86    |      |      |       |
| $\psi_{83}$          | 0.0  | -0.00 |       | 0.00 | 0.00 | 0.00 |      | 78    |      |      |       |

*Continued on next page*

Table S15 – *Continued from previous page*

| Par              | True | Bias  | RBias | SE   | MCSE | RMSE | SENS | CR(%) | ESS | %ESS | %Rhat |
|------------------|------|-------|-------|------|------|------|------|-------|-----|------|-------|
| $\psi_{84}$      | 0.0  | 0.00  |       | 0.00 | 0.00 | 0.00 |      | 85    |     |      |       |
| $\psi_{85}$      | 0.0  | 0.00  |       | 0.00 | 0.00 | 0.00 |      | 85    |     |      |       |
| $\psi_{86}$      | 0.0  | 0.00  |       | 0.00 | 0.00 | 0.00 |      | 84    |     |      |       |
| $\psi_{87}$      | 0.0  | 0.00  |       | 0.00 | 0.01 | 0.01 |      | 44    |     |      |       |
| $\psi_{91}$      | 0.0  | -0.00 |       | 0.01 | 0.01 | 0.01 |      | 92    |     |      |       |
| $\psi_{92}$      | 0.0  | 0.00  |       | 0.01 | 0.01 | 0.01 |      | 95    |     |      |       |
| $\psi_{93}$      | 0.0  | 0.00  |       | 0.00 | 0.00 | 0.00 |      | 93    |     |      |       |
| $\psi_{94}$      | 0.0  | 0.00  |       | 0.00 | 0.00 | 0.00 |      | 93    |     |      |       |
| $\psi_{95}$      | 0.0  | -0.00 |       | 0.00 | 0.00 | 0.00 |      | 89    |     |      |       |
| $\psi_{96}$      | 0.0  | 0.00  |       | 0.00 | 0.00 | 0.00 |      | 89    |     |      |       |
| $\psi_{97}$      | 0.0  | 0.01  |       | 0.00 | 0.01 | 0.01 |      | 60    |     |      |       |
| $\psi_{98}$      | 0.0  | 0.00  |       | 0.00 | 0.01 | 0.01 |      | 64    |     |      |       |
| $\mu_{1,i}$      |      | -0.00 | -0.01 | 0.23 | 0.34 | 0.35 | 0.59 | 82    |     |      |       |
| $\mu_{2,i}$      |      | -0.00 | -0.26 | 0.21 | 0.36 | 0.34 | 0.66 | 81    |     |      |       |
| $a_{1,i}$        |      | -0.00 | 0.08  | 0.06 | 0.19 | 0.15 | 0.99 | 75    |     |      |       |
| $a_{2,i}$        |      | 0.00  | 0.20  | 0.06 | 0.20 | 0.16 | 0.97 | 76    |     |      |       |
| $b_{1,i}$        |      | 0.00  | -1.70 | 0.06 | 0.22 | 0.17 | 0.56 | 74    |     |      |       |
| $b_{2,i}$        |      | -0.00 | 0.38  | 0.06 | 0.21 | 0.17 | 0.56 | 74    |     |      |       |
| $\sigma_{1,i}^2$ |      | -0.03 | 0.33  | 0.64 | 3.58 | 2.72 | 1.00 | 72    |     |      |       |
| $\sigma_{2,i}^2$ |      | -0.02 | 0.33  | 0.63 | 3.64 | 2.67 | 1.00 | 71    |     |      |       |
| $r_i$            |      | -0.01 | -0.42 | 0.10 | 0.31 | 0.24 | 0.76 | 73    |     |      |       |
